1

2 **Positive Feedback Between Contractile Ring Myosin and Ring-Directed Cortical Flow Drives**

3 **Cytokinesis**

4

5 Renat N. Khaliullin<sup>1\*</sup>, Rebecca A. Green<sup>1</sup>, Linda Z. Shi<sup>2</sup>, J. Sebastian Gomez-Cavazos<sup>1</sup>, Michael W.  
6 Berns<sup>2</sup>, Arshad Desai<sup>1</sup>, and Karen Oegema<sup>1\*</sup>

7 <sup>1</sup>Department of Cellular and Molecular Medicine, Ludwig Institute for Cancer Research, University of  
8 California, San Diego, La Jolla, CA 92093, USA.

9

10 <sup>2</sup>Department of Bioengineering and Institute of Engineering in Medicine, University of California, San  
11 Diego, 9500 Gilman Drive, La Jolla, CA, 92093, USA

12

13 \*Correspondence to: Karen Oegema ([koegema@ucsd.edu](mailto:koegema@ucsd.edu)); Renat N. Khaliullin ([renatkh@gmail.com](mailto:renatkh@gmail.com))

14

15 **ABSTRACT**

16 During cytokinesis, an equatorial actomyosin contractile ring rapidly transforms cell shape by constricting  
17 at a relatively constant rate despite its progressively decreasing size. The closure rate per unit length of  
18 the ring must accelerate as the ring gets smaller to maintain the overall constant rate of closure. Here,  
19 we examine the mechanistic basis for this acceleration by generating a 4D map of cortical flow in  
20 conjunction with monitoring ring component dynamics during the first division of the *C. elegans* embryo.  
21 This analysis reveals that acceleration arises because ring myosin pulls on the adjacent cortex  
22 generating ring-directed cortical flow that, in turn, accelerates constriction by delivering cortical myosin  
23 into the ring. We derive an analytical mathematical formulation that captures the positive feedback-  
24 dependent evolution of the contractile ring and use this formulation to provide a non-intuitive explanation  
25 for why reducing myosin activation by rho kinase inhibition slows contractile ring closure.

26

27 **IMPACT STATEMENT:** During cytokinesis, positive feedback between myosin motors in the contractile  
28 ring and ring-directed cortical flow drives constriction rate acceleration to ensure timely cell separation.

29

30 **MAJOR SUBJECT AREAS:** Cell biology, Computational and Systems Biology

31

32 **KEYWORDS:** contractile ring, cortical flow, positive feedback, analytical mathematical model, rho kinase,  
33 LET-502, myosin II, anillin

34

## 35 INTRODUCTION

36 During cytokinesis in animal cells, constriction of an equatorial actomyosin ring cinches the  
37 mother cell surface to generate a dumbbell-shaped structure with an intercellular bridge that connects  
38 the two daughter cells (Fededa & Gerlich, 2012; Green, Paluch, & Oegema, 2012). The contractile ring  
39 assembles in response to the equatorial activation of RhoA (Green et al., 2012; Jordan & Canman, 2012;  
40 A. Piekny, Werner, & Glotzer, 2005), which patterns the cortex by recruiting contractile ring components  
41 from the cytoplasm (Vale, Spudich, & Griffis, 2009; Yumura, 2001; Zhou & Wang, 2008). Recent work in  
42 the *C. elegans* embryo suggests that the equatorial cortex is compressed after this initial patterning,  
43 leading to the alignment of actin filament bundles as the ring forms (Reymann, Staniscia, Erzberger,  
44 Salbreux, & Grill, 2016). After its assembly, the ring is thought to progressively disassemble as it  
45 constricts (Murrell, Oakes, Lenz, & Gardel, 2015; Schroeder, 1990). Ring constriction must complete  
46 within a short cell cycle window during mitotic exit (Canman, Hoffman, & Salmon, 2000; Martineau,  
47 Andreassen, & Margolis, 1995; Straight et al., 2003). Timely constriction relies on the conserved ability of  
48 contractile rings to maintain a relatively constant closure rate despite their progressively decreasing  
49 perimeter (Biron, Libros, Sagi, Mirelman, & Moses, 2004; Bourdages, Lacroix, Dorn, Descovich, &  
50 Maddox, 2014; Calvert et al., 2011; Carvalho, Desai, & Oegema, 2009; Ma et al., 2012; Mabuchi, 1994;  
51 Pelham & Chang, 2002; Zumdieck, Kruse, Bringmann, Hyman, & Julicher, 2007). This property implies  
52 that rings close at a faster rate per unit length as they get smaller. Prior work postulated that this  
53 acceleration arises because force generators, either myosin motors (Wu & Pollard, 2005) or actin  
54 filament-based contractile units (Carvalho et al., 2009), are retained during constriction, leading to an  
55 increase in their amount per unit length. This retention model presumes that acceleration arises from  
56 processes intrinsic to the contractile ring, ignoring potential influence of interactions between the ring and  
57 the adjacent cortex.

58 Here, we examine the role of interactions between the ring and surrounding cortex on contractile  
59 ring dynamics in the *C. elegans* embryo. Through 4D analysis of cortical flow in conjunction with  
60 monitoring of ring component dynamics during closure, we show that acceleration of the per unit length  
61 constriction rate does not arise from ring-intrinsic component retention, but instead results from positive

62 feedback between ring myosin and ring-directed cortical flow. We derive an analytical mathematical  
63 formulation that captures the positive feedback-dependent evolution of the contractile ring and employ it  
64 to analyze experimental data to assess the effects of rho kinase inhibition, uncovering a new, non-  
65 intuitive explanation for why reducing myosin activation by rho kinase inhibition slows ring closure.

66



67 **RESULTS**

68 ***The cortex at the cell poles expands in response to tension generated by the constricting ring,***  
69 ***whereas the intervening cortex flows towards the ring without expansion***

70 To assess the significance of interactions between the contractile ring and surrounding cortex on  
71 contractile ring dynamics, we generated a 4D map of cortical flow to determine how the cortex responds  
72 to ring pulling. We monitored cortical movement at high time resolution (**Figure 1A, Video 1**) in embryos  
73 expressing a GFP fusion with the heavy chain of non-muscle myosin II (NMY-2; hereafter myosin::GFP;  
74 **Figure 1 – Figure Supplements 1, 2**), while also monitoring ring constriction at lower time resolution in  
75 the same embryos (**Figure 1A, Figure 1 – Figure Supplement 3**). Myosin::GFP flowed together with  
76 actin (LifeAct::mKate2) on the embryo surface (**Figure 1 – Figure Supplement 4**), consistent with prior  
77 work indicating that the entire cell surface, from cortex-associated cytoplasmic granules to cell surface  
78 receptors, moves in a coordinated fashion during cytokinesis (Cao & Wang, 1990; DeBiasio, LaRocca,  
79 Post, & Taylor, 1996; Fishkind, Silverman, & Wang, 1996; Hird & White, 1993; Reymann et al., 2016;  
80 Swann & Mitchison, 1958; Wang, Silverman, & Cao, 1994). Because the contractile ring closes  
81 asymmetrically within the division plane ((Maddox, Lewellyn, Desai, & Oegema, 2007); **Figure 1A,**  
82 **Figure 1 – Figure Supplement 3**), the pattern of cortical movement cannot be inferred from imaging  
83 individual embryos. Therefore, we generated an average 4D map of cortical flow by computationally  
84 combining data from 93 embryos imaged in random rotational orientations (**Figure 1A, Figure 1 –**  
85 **Figure Supplement 3**). We defined the top of the embryo as the side where the furrow ingresses first,  
86 the bottom as the opposite side, and referenced positions around the embryo circumference by the angle  
87  $\theta$ . For temporal alignment, we fit a line to normalized ring size ( $\bar{R} = R/R_{emb}$ ) versus time between 30%  
88 and 80% closure for each embryo, and extrapolated this line to 1 and 0 to define  $t_0$  (cytokinesis onset)  
89 and  $t_{CK}$  (time of cytokinesis), respectively (**Figure 1A, Figure 1 – Figure Supplement 3**). Cortical flow  
90 could not be monitored in the division plane or at the cell poles, due to their high curvature. Thus, this  
91 approach provided a quantitative picture of cortical movement in the central 2/3 of the embryo throughout  
92 cytokinesis (**Figure 1B; Video 2**).

93           The 4D map of cortical flow allowed us to determine where new cortical surface is gained as the  
94 ring closes. New cortical surface could be gained uniformly, immediately behind the contractile ring, or at  
95 the cell poles (Bluemink & de Laat, 1973; Byers & Armstrong, 1986; Danilchik, Bedrick, Brown, & Ray,  
96 2003; Gudejko, Alford, & Burgess, 2012; Selman & Perry, 1970; Swann & Mitchison, 1958; Turlier,  
97 Audoly, Prost, & Joanny, 2014; Zumdieck et al., 2007), with each pattern predicting a different profile of  
98 cortical velocity along the embryo axis (**Figure 1 – Figure Supplement 5**). The cortical velocity profiles  
99 measured from the flow map indicated that cortical surface is gained at the poles and subsequently  
100 moves with constant velocity towards the division plane (**Figure 1B**). The velocity of cortical flow was  
101 higher on the top of the embryo during the first half of cytokinesis when the furrow ingresses from the top  
102 (**Figure 1B, black traces**) and became higher on the bottom of the embryo towards the end when the  
103 furrow ingresses from the bottom (**Figure 1B, grey traces; Video 2**).

104           Cutting the cortex parallel or perpendicular to the division plane using a laser revealed that the  
105 cortex is under tension during cytokinesis (**Figure 2A**). However, parallel laser cuts had no effect on the  
106 constriction rate (**Figure 2B,C**) indicating that cortical tension does not impose significant resistance to  
107 ring pulling. Inhibiting the Arp2/3 complex by depleting its ARX-2 subunit, which is expected to reduce  
108 effective cortical viscosity and thus cortical tension (Chaudhuri, Parekh, & Fletcher, 2007; Davies et al.,  
109 2014; Tseng & Wirtz, 2004), also did not alter the constriction rate (**Figure 2 – Figure Supplement 1**).  
110 Together, these results indicate that the cortex at the poles expands in response to tension generated by  
111 the constricting ring, whereas the cortex in the region between the ring and the poles flows towards the  
112 ring without expansion or compression. This differential response of the polar cortex to ring-generated  
113 tension, which results in a flow of myosin and other cortical components towards the cell equator, is  
114 consistent with the idea of polar relaxation hypothesized in early conceptual models of cytokinesis  
115 (Greenspan, 1978; Swann & Mitchison, 1958; Taber, 1995; White & Borisy, 1983; Wolpert, 1960;  
116 Zinemanas & Nir, 1987, 1988).

117

118 ***The contractile ring pulls in extra cortex during constriction, leading to an exponential increase in***  
119 ***the levels of ring components and in the ring constriction rate***

120 Recent work in the *C. elegans* embryo suggested that recruitment of contractile ring proteins  
121 following anaphase onset leads to compression of the equatorial cortex that aligns actin filaments to form  
122 the contractile ring (Reymann et al., 2016). Consistent with this, a gradient of cortical flow velocity that  
123 spans the cell equator is observed in our flow map at early timepoints prior to furrow ingression (**Figure 2**  
124 – **Figure Supplement 2**). After contractile ring assembly, the ring has been proposed to constrict in an  
125 autonomous manner via continuous disassembly (Murrell et al., 2015; Schroeder, 1975). In this view, the  
126 constricting ring would generate the division plane by pulling the cortex behind it, and the amount of  
127 cortex entering the division plane would equal the area of the division plane. To test this prediction, we  
128 analyzed the 4D cortical flow map to measure the total cortical surface area entering the division plane  
129 and compare it to the area of the division plane (accounting for the fact that two surfaces are generated-  
130 *red outline in Figure 3A*). Surprisingly, this analysis revealed that significantly more cortical surface  
131 entered the division plane than is necessary to build the plane: the flux of cortical area into the division  
132 plane was 1.5 to 2-fold higher than the rate of change in the area of the division plane throughout  
133 cytokinesis (**Figure 3A,B**). In control embryos, more cortex flowed in from the posterior side than from  
134 the anterior side, likely due to distinct mechanical cortical properties downstream of the polarity  
135 machinery. Consistent with this, and with prior work showing that Arp2/3 inhibition impairs the  
136 recruitment of PAR-2 to the posterior cortex and makes myosin and actin dynamics on the posterior  
137 cortex more similar to those in embryo anterior (Xiong, Mohler, & Soto, 2011), inhibiting the Arp2/3  
138 complex by depleting ARX-2 abolished the difference between the two sides, but did not change the  
139 imbalance between the total amount of cortex entering the division plane and the area of the plane  
140 (**Figure 3 – Figure Supplement 1; Video 3**). Thus, significantly more cortical surface enters the division  
141 plane during cytokinesis than expected if the cortex passively trails behind the closing ring (**Figure 3A**).

142 The extra cortex delivered into the division plane could concentrate in the ring and contribute to  
143 its closure, distribute within the division plane, or be lost due to disassembly (**Figure 3C**). To distinguish  
144 between these and other possibilities, we monitored *in situ*-tagged myosin::GFP (Dickinson, Ward,  
145 Reiner, & Goldstein, 2013) (**Figure 3D**) and GFP::anillin (**Figure 3 – Figure Supplement 2**) in the  
146 division plane. Both probes exhibited similar behavior, accumulating primarily within the ring (**Figure 3D**,

147 **Figure 3 – Figure Supplement 3**). Quantification of mean per unit length fluorescence around the ring  
148 (after attenuation correction; **Figure 3 – Figure Supplement 4**) revealed a steady increase for both  
149 markers as constriction proceeded. The increase began on the top, which ingresses first, and initiated  
150 later on the bottom, which ingresses after the constriction midpoint (**Figure 3D, Figure 3 – Figure**  
151 **Supplement 3**). Thus, monitoring of myosin and anillin suggests that the extra cortical surface flowing  
152 into the division plane is incorporated into the ring and predicts that the amount of ring myosin and anillin  
153 should increase in proportion to the flux of extra cortical surface into the ring (**Figure 3E**). To test this  
154 prediction, we compared the per unit length rate of ring-directed cortical flow to the per unit length  
155 amounts of myosin and anillin. All were well-fit by the same single exponential (**Figure 3E,F**), consistent  
156 with the idea that cortical surface flowing into the division plane delivers components to the contractile  
157 ring during constriction.

158 The exponential increase in the per unit length levels of ring myosin and anillin during constriction  
159 (**Figure 3F**) is best explained by positive feedback: ring myosin pulls in adjacent cortex, bringing  
160 additional myosin motors into the ring that in turn increase the velocity of ring-directed cortical flow  
161 (**Figure 3G**). The per unit length constriction rate also increases with the same exponential kinetics as  
162 the per unit length rate of ring-directed cortical flow and the per unit length amounts of anillin and myosin  
163 (**Figure 3H**). This coupling likely arises because the constriction rate, like the rate of ring-directed cortical  
164 flow, depends on the amount of ring myosin. The exponential increase in the per unit length constriction  
165 rate explains the ability of contractile rings to close at a relatively constant rate despite their progressively  
166 decreasing perimeter (Biron et al., 2004; Bourdages et al., 2014; Calvert et al., 2011; Carvalho et al.,  
167 2009; Ma et al., 2012; Mabuchi, 1994; Pelham & Chang, 2002; Zumdieck et al., 2007). A relatively  
168 constant rate of closure is observed over a significant portion of ring constriction (**Figure 1A**;  $t = 50$ -  
169 200s) because the exponential increase in the per unit length constriction rate balances the decrease in  
170 ring size.

171

172 ***Component levels and fluorescence recovery after photobleaching of the division plane support***  
173 ***constriction rate acceleration due to ring-directed flow versus component retention***

174 Our results indicate that the per unit length amount of contractile ring components increases  
175 exponentially, and suggest that this increase is due to delivery by cortical flow along the direction  
176 perpendicular to the ring. In this model, constriction in the around-the-ring direction does not alter the per  
177 unit length amount of ring components, but instead drives ring disassembly that reduces the total amount  
178 of ring components in proportion to the reduction in ring length (**Figure 4A, left panel**). An alternative  
179 model for the increase in the per unit length amount of ring components, proposed based on work in  
180 fission yeast (Wu & Pollard, 2005), is that myosin and anillin could be retained within the ring rather than  
181 lost as ring perimeter decreases during constriction (**Figure 4A, middle panel**). In the retention model,  
182 the total amounts of both components remain constant as the ring closes resulting in an increase in their  
183 per unit length amount that is inversely proportional to the reduction in ring size. Comparison with the  
184 total amounts of ring myosin and anillin suggested that, whereas the retention model fits the data well for  
185  $t/t_{ck}$  between 0.2 and 0.6, there was significant deviation for timepoints outside of this range. In contrast,  
186 the ring-directed cortical flow model fit the data for the entire measured interval ( $t/t_{ck} = 0.0$  to 0.8; **Figure**  
187 **4B, Figure 3 – Figure Supplement 3**).

188 To distinguish between the retention and ring-directed flow models using an independent  
189 approach, we photobleached myosin in the entire division plane at ~30% closure, and monitored its  
190 subsequent recovery in the ring (**Figure 4C**). The ring-directed cortical flow model predicts that the per  
191 unit length amount of bleached myosin should be constant and, since cortical myosin turns over faster  
192 than myosin in the ring ( $t_{1/2}$  of ~30s (Mayer, Depken, Bois, Julicher, & Grill, 2010; Salbreux, Charras, &  
193 Paluch, 2012)), cortical flow should rapidly deliver unbleached fluorescent myosin to the ring, leading to  
194 an exponential increase comparable to that in controls. In contrast, the retention model predicts that the  
195 per unit length amount of bleached myosin and any residual fluorescent myosin that is retained in the  
196 ring will increase in proportion to the decrease in the ring size ( $\sim 1/R$ ). We found that the per unit length  
197 amount of fluorescent myosin in the ring increased exponentially following bleaching, and the difference  
198 between the control and the bleached embryos, which reflects the amount of bleached myosin, remained  
199 constant, both of which agree with the predictions of the ring-directed cortical flow model (**Figure 4C**).  
200 We note that this data also suggests that the recovery of myosin fluorescence in the ring is not due to

201 exchange with myosin in the cytoplasm. If ring myosin were turning over due to exchange with  
202 cytoplasmic myosin, we would expect the FRAP curve to approach the control curve and the difference  
203 between the FRAP and control curves to disappear. Instead, the two curves remained parallel and the  
204 difference remained constant (**Figure 4C**). This data suggest that rather than being due to exchange with  
205 cytoplasmic myosin, the recovery of ring fluorescence is due to a mechanism in which myosin on the  
206 cortex adjacent to the ring turns over, allowing resumption of delivery of myosin to the ring by cortical  
207 flow.

208 The conclusion that the per unit length amount of contractile ring components increases  
209 exponentially during constriction is in apparent contradiction to analysis in 4-cell stage *C. elegans*  
210 embryos, where we had previously reported an ~1.3-fold increase in myosin, anillin and septins as the  
211 ring perimeter decreased 2-fold (from 50 to 25  $\mu\text{m}$ ). However, this is in fact consistent with the prediction  
212 of the ring-directed cortical flow model (see **Figure 4 – Figure Supplements 1, 2** for an analysis of ring  
213 component levels and recovery following photobleaching at the 4-cell stage).

214 Together these data suggest that, the acceleration of the per unit length constriction rate during  
215 closure, a conserved feature of contractile rings, does not arise from ring component retention, but from  
216 positive feedback between ring myosin and ring-directed cortical flow.

217

### 218 ***An analytical mathematical formulation for the positive feedback-mediated evolution of the*** 219 ***contractile ring***

220 The exponential accumulation of contractile ring components during constriction due to positive  
221 feedback means that the properties of the ring (component levels and constriction rate) are continuously  
222 changing. Thus, analysis of perturbations requires fitting temporal profiles of ring size or component  
223 levels and deriving meaningful quantitative parameters from these fits. In order to assess the  
224 consequences of molecular perturbations, we therefore translated our experimental findings  
225 (summarized in **Figure 5A**) into an analytical mathematical framework (see **Methods** for detailed  
226 derivation), consisting of three equations and three model parameters, that we named the Cortical Flow  
227 Feedback (CoFFee) model (**Figure 5B**). Based on our photobleaching data, we assume that: (1)

228 constriction in the around-the-ring direction does not alter the per unit length amount of ring components,  
229 but leads to ring disassembly that reduces the total amount of ring components in proportion to the  
230 reduction in ring length, and (2) myosin in the contractile ring does not turn over by exchange with  
231 myosin in the cytoplasm. Thus, increases in the per unit length amount of ring myosin are solely due to  
232 delivery by cortical flow along the direction perpendicular to the ring. We posit that myosin increases  
233 exponentially during constriction due to positive feedback between the per unit length amount of ring  
234 myosin and the velocity of cortical flow that delivers myosin into the ring. Positive feedback arises from  
235 the fact that the velocity of ring-directed cortical flow is proportional to the amount of ring myosin, and the  
236 amount of ring myosin increases in proportion to the velocity of cortical flow (**Figure 5A**). In our  
237 mathematical formulation, the velocity of ring-directed cortical flow ( $v_{flow}(t)$ ) is related to the amount of  
238 ring myosin ( $M_{ring}(t)$ , per unit length) by a proportionality constant  $\alpha$  that reflects the ability of the cortex  
239 to be compressed (**Figure 5B**, Eqn. (1)), and ring myosin increases at a rate proportional to the velocity  
240 of ring-directed cortical flow and the concentration of cortical myosin ( $m_{cort}$ ; **Figure 5B**, Eqn. (2)). As a  
241 result of the positive feedback, ring myosin increases exponentially with a characteristic time  $\tau :=$   
242  $1/\alpha m_{cort}$  (time required for ring myosin to increase  $\sim 2.7$  fold; **Figure 5B**, lower left). The per unit length  
243 constriction rate is proportional to the amount of ring myosin, being related by a constant  $\beta$  that reflects  
244 the ability of the ring to be constricted (**Figure 5B**, Eqn. (3)).

245 To obtain expressions for contractile ring size and component levels that can be used to fit data,  
246 we solved the model equations in a specific time reference. Instead of  $t = 0$  being defined by  
247 extrapolation of plots of  $\bar{R}$  ( $:= R/R_{emb}$ ) versus time (**Figure 1A**), which is not ideal in a mathematical  
248 formulation, we set  $t = 0$  as the halfway point of ring closure ( $\bar{R}(t = 0) = \frac{1}{2}$ ). This time reference also  
249 avoids the difficulty of assessing cytokinesis onset. In this time reference, the equation for ring size is:

$$\bar{R}(\bar{t}) = \bar{R}_{ini}(2\bar{R}_{ini})^{-\exp(\bar{t})}, \quad (4)$$

250 where  $\bar{t} := t/\tau$  and  $\bar{R}_{ini}$  is the dimensionless characteristic ring size (held fixed at a value of 1.1; see  
251 Methods). Any component that localizes to the cell cortex will be delivered to the contractile ring via the  
252 same process as myosin, so contractile ring components all accumulate in a similar fashion, with



$$C_{ring}(\bar{t}) - C_{ring,base} = \frac{\alpha c_{cort}}{\beta} \ln(2\bar{R}_{ini}) e^{\bar{t}}, \quad (5)$$

$$C_{ring,base} := C_{0,ring} - \ln(2\bar{R}_{ini}) \frac{\alpha c_{cort}}{\beta}, \quad (6)$$

253 where  $C_{0,ring}$  is the per unit length amount of the component at the half-way point of ring closure,  
254  $C_{ring,base}$  is the baseline amount of the ring component that does not increase exponentially, and  $c_{cort}$   
255 ( $m_{cort}$  for myosin) is the concentration of the component on the cortex that is delivered to the ring. The  
256 velocity of cortical flow and the constriction rate are

$$v_{flow}(\bar{t}) = \frac{\alpha}{\beta} \ln(2\bar{R}_{ini}) e^{\bar{t}}, \quad (7)$$

$$-\frac{1}{\bar{R}} \frac{d\bar{R}}{d\bar{t}} = \ln(2\bar{R}_{ini}) e^{\bar{t}}. \quad (8)$$

257 Thus, the per unit length constriction rate, velocity of cortical flow, and ring component amounts  
258 all increase exponentially with the characteristic time of ring myosin accumulation ( $\tau = 1/\alpha m_{cort}$ ) set by  
259 the feedback loop between ring myosin and cortical flow (**Figure 5B**), as we observe experimentally  
260 (**Figure 3E-H**).

261

### 262 **Reducing the concentration of cortical myosin reduces the ability of the ring to be constricted by** 263 **ring myosin**

264 To address the effect of reducing myosin activation on cytokinesis, we used our mathematical  
265 formulation to analyze the effects of depleting rho kinase (LET-502). Rho kinase contributes to myosin  
266 activation by promoting regulatory light chain phosphorylation. Due to parallel pathways for myosin  
267 activation, penetrant rho kinase inhibition slows, but does not prevent, ring constriction (Maddox et al.,  
268 2007; Matsumura, 2005; A. J. Piekny & Mains, 2002). We imaged control and rho kinase-depleted  
269 embryos expressing *in situ* tagged myosin::GFP. To assess the impact of rho kinase inhibition on the  
270 properties of the ring and cortex encoded in our three model parameters ( $\alpha$ ,  $\beta$ , and  $m_{cort}$ ), we directly  
271 measured  $m_{cort}$  and fit experimental measurements of ring size and ring myosin versus time to  
272 equations (4) and (5) to determine the effects on  $\alpha$  and  $\beta$  (**Figure 6A**). Direct measurement revealed that



273 the amount of cortical myosin,  $m_{cort}$ , was reduced by 20% in rho kinase depleted embryos compared to  
274 controls ( $m_{cort}^{RKdep} = 0.8 m_{cort}^{WT}$ ; **Figure 6B**). Next, we fit traces of ring size versus time using the ring size  
275 equation (4) to determine characteristic times, ( $\tau = 1/\alpha m_{cort}$ ), for each embryo. This analysis revealed  
276 that  $\tau$  was 1.3-fold higher in rho kinase-depleted embryos compared to controls ( $120 \pm 20$  s versus  
277  $90 \pm 10$  s in controls; **Figure 6C, middle row**) indicating that  $\alpha^{RKdep} m_{cort}^{RKdep} = 0.8 \alpha^{WT} m_{cort}^{WT}$ . Since  
278  $m_{cort}^{RKdep} = 0.8 m_{cort}^{WT}$ , we conclude that  $\alpha^{RKdep} = \alpha^{WT}$ ; thus, the ability of the cortex to be compressed by  
279 ring myosin is not affected by rho kinase depletion. To determine the effect on  $\beta$ , we measured the mean  
280 per unit length amount of myosin::GFP in the ring versus time in control and rho kinase depleted  
281 embryos and fit the data to the equation for ring myosin (5). Interestingly, the per unit length amount of  
282 myosin for a given ring size was the same in control and rho kinase depleted embryos, resulting in an  
283 equivalent exponential prefactor for the two conditions ( $\alpha^{RKdep} m_{cort}^{RKdep} / \beta^{RKdep} = \alpha^{WT} m_{cort}^{WT} / \beta^{WT}$ ;  
284 **Figure 6C, bottom row, Figure 6 – Figure Supplement 1**). From this we conclude that the ability of the  
285 ring to be constricted by ring myosin is reduced in rho kinase depleted embryos compared to controls  
286 ( $\beta^{RKdep} = 0.8 \beta^{WT}$ ).

287 The effects of rho kinase inhibition identified by our analysis are schematically summarized in  
288 Figures 7A and B. Rho kinase inhibition decreases the concentration of cortical myosin,  $m_{cort}$ , to 80% of  
289 its value in controls, which slows myosin accumulation via the feedback loop and increases  $\tau$ .  
290 Normalizing time by  $\tau$  and setting  $\bar{t} = 0$  at 50% closure superimposes the constriction rate curve with the  
291 control (**Figure 7B, Figure 7 – Figure Supplement 1**). This is a convenient reference frame for  
292 comparing two conditions because comparing component levels and flow velocity at the same  $\bar{t}$   
293 corresponds to comparing them for the same ring size. Perturbations that reduce the ability of the ring to  
294 be constricted by ring myosin (reduce  $\beta$ ) introduce a time delay between cortical flow/accumulation of  
295 contractile ring components and the constriction rate (see **Figure 7 – Figure Supplement 2** for detailed  
296 explanation). The length of the delay is the amount of time it takes for the feedback loop to accumulate  
297 enough ring myosin to compensate for the reduction in  $\beta$ . After the delay, ring closure proceeds with  
298 kinetics identical to controls but with higher flow velocities and ring component concentrations. Due to the  
299 reduction in  $\beta$  in rho kinase depleted embryos, the velocity of cortical flow is predicted to be 1.25 fold

300 higher for all ring sizes in the  $\bar{\tau}$  reference frame (**Figure 7B**, middle panel). Thus, our analysis suggests  
301 that the per unit length amount of myosin is the same for rings of all sizes in control and rho kinase  
302 depleted embryos (**Figure 6C**) because there is an increase in the amount of cortical flow into the ring  
303 that compensates for the reduction in the concentration of cortical myosin (**Figure 7B**, last panel).

304         Filming control and rho kinase depleted embryos expressing GFP::anillin and measuring the  
305 concentration of cortical anillin ( $c_{ani,cort}$ ) revealed that it is not altered by rho kinase inhibition. Thus, if  
306 our prediction that there is more cortical flow into the ring in rho kinase depleted embryos is correct, the  
307 per unit length amount of cortical anillin should be 1.25-fold higher in rings of all sizes in rho kinase  
308 depleted embryos compared to control embryos. Consistent with this prediction, measurement of mean  
309 per unit length GFP::anillin fluorescence in the ring revealed a 1.21 fold increase (**Figure 7C**, **Figure 6 –**  
310 **Figure Supplement 1**). Thus, an analysis of rho kinase-depleted embryos employing the mathematical  
311 formulation of the positive feedback model for cytokinetic ring closure leads to the counterintuitive  
312 conclusion that reducing the concentration of cortical myosin makes it more difficult for rings of the same  
313 size with the same amount of myosin to constrict. We suggest that this may be because the  
314 compensatory increase in cortical flow that restores ring myosin to control levels leads to an  
315 overabundance of other components (e.g. anillin) that increase resistance of the ring to constriction.  
316 More broadly, the analysis of rho kinase inhibition, employing straightforward-to-measure experimental  
317 parameters, highlights the utility of the mathematical formulation we present to explain the complex and  
318 non-intuitive effects of molecular perturbations on cytokinesis.

319

## 320 DISCUSSION

321 Despite the physical connection between the contractile ring and adjacent cortex, how these  
322 interconnected regions function together to change cell shape during cytokinesis has not been clear.  
323 Here, we explore this question during the first division of the *C. elegans* embryo by generating a 4D map  
324 of cortical flow in conjunction with laser ablation experiments and monitoring of ring component dynamics  
325 in the division plane. Our results indicate that polar relaxation collaborates with cortical contractility at the  
326 cell equator to enable the assembly and subsequent structural evolution during constriction of the  
327 contractile ring. In particular, we show that the pattern of polar relaxation and equatorial contractility set  
328 up by spindle-based signaling generates a positive feedback loop between ring myosin and ring-directed  
329 cortical flow that feeds the ring. The resulting exponential increase in the per unit length constriction rate  
330 explains the ability of the ring to close at a relatively constant overall rate despite its progressively  
331 decreasing perimeter during constriction. The broad conservation of this property (Biron et al., 2004;  
332 Bourdages et al., 2014; Calvert et al., 2011; Carvalho et al., 2009; Ma et al., 2012; Mabuchi, 1994;  
333 Pelham & Chang, 2002; Zumdieck et al., 2007), which allows cytokinesis to complete in a temporally  
334 restricted cell cycle window (Canman et al., 2000; Martineau et al., 1995; Straight et al., 2003), suggests  
335 that feedback between contractile ring myosin and ring-directed cortical flow will be a broadly conserved  
336 property of contractile rings in animal cells. The feedback-based mechanism we describe here, in which  
337 the increase in myosin levels in the ring is due to cortical flow along the direction perpendicular to the  
338 ring contrasts with prior models, including a model previously proposed by our group, that constriction  
339 rate acceleration arises from the ring-intrinsic retention of force generating units (Carvalho et al., 2009;  
340 Wu & Pollard, 2005).

341 In addition to ensuring timely cell content partitioning, the feedback-based mechanism that we  
342 describe renders the ring robust to defects in the cytokinesis machinery that increase the difficulty of ring  
343 constriction, such as in the inhibition of rho kinase that we investigate here, and/or to internal or external  
344 mechanical challenges, such as cell-cell contacts or obstacles in the crowded cell interior. In all of these  
345 cases, the feedback loop between ring myosin and cortical flow would lead to the progressive build up of  
346 contractile ring components until constriction proceeded. An interesting caveat, suggested by modeling

347 (Figure 7—figure supplement 2) is that molecular perturbations that reduce the ability of the ring to be  
348 constricted by ring myosin (reduce  $\beta$  in the mathematical formulation) do not alter the kinetics of  
349 contractile ring closure. Instead, they introduce a time delay that allows the ring to accumulate enough  
350 myosin to overcome the reduced  $\beta$ . After this delay, constriction proceeds with kinetics identical to  
351 controls, but with higher component levels and flow velocities throughout closure. Experimentally, this  
352 means that perturbations that make ring constriction more difficult will not be detected by monitoring  
353 constriction kinetics in the absence of a reliable time reference for cytokinesis onset, since the introduced  
354 delay may be relatively small. The second signature feature of these perturbations, higher component  
355 levels throughout closure, would likely be easier to measure (e.g., by quantifying ring component levels  
356 at the closure halfpoint).

357 We note that ring-directed flows have also been observed in the context of wound healing  
358 (Mandato & Bement, 2003), and similar types of cortical dynamics driven by coordinated patterns of  
359 contractility and relaxation are relevant in many contexts including cell polarization, cell motility, and  
360 tissue morphogenesis (Gardel, Schneider, Aratyn-Schaus, & Waterman, 2010; Munjal & Lecuit, 2014;  
361 Salbreux et al., 2012), suggesting that the positive feedback between myosin in contractile structures  
362 and cortical flow will act in physiological contexts beyond cytokinesis.

363

364 ***Polar relaxation enables ring-directed cortical flow that feeds the contractile ring during***  
365 ***constriction***

366 The cortical flow map and laser ablation analysis indicate that recruitment of myosin to the  
367 equatorial cortex leads to local compression that places the adjacent cortex under tension. In response  
368 to this tension, the polar cortex expands; in contrast, the cortex between the poles and the equator flows  
369 towards the ring without expanding. These observations suggest that the polar cortex has distinct  
370 mechanical properties. These distinct properties could arise from different, non-exclusive mechanisms.  
371 The polar cortex may be less stiff than the rest of the cortex, causing it to stretch and thin in response to  
372 ring constriction-induced tension. Consistent with this idea, a reduction in f-actin intensity at the cell poles  
373 has been reported during cytokinesis in *Drosophila* cells due to delivery of a phosphatase by segregating

374 chromosomes (Rodrigues et al., 2015). Alternatively, the polar cortex may turnover more rapidly, leading  
375 to a higher rate of surface renewal after stretching. A third possibility is that the polar cortex is more  
376 prone to rupture, repair of which would locally increase cortical surface. Consistent with this last idea,  
377 blebs have been reported at the cell poles in cultured vertebrate and *Drosophila* cells, where they have  
378 been proposed allow cells to elongate in anaphase and release tension at the poles (Hickson, Echard, &  
379 O'Farrell, 2006; Sedzinski et al., 2011). Understanding precisely how the polar cortex is different in  
380 molecular and mechanical terms, and the mechanisms that generate these differences are important  
381 goals for future work.

382         Early conceptual models of cytokinesis hypothesized that polar relaxation coupled to a global  
383 upregulation of surface tension could trigger a flow of tension-generating elements towards the equator  
384 that would compress into a circular band and initiate a feedback loop similar to the one we describe here  
385 (Greenspan, 1978; Swann & Mitchison, 1958; Taber, 1995; White & Borisy, 1983; Wolpert, 1960;  
386 Zinemanas & Nir, 1987, 1988). Although polar relaxation could drive cytokinesis on its own, the  
387 compressed band of cortex would be sensitive to the mechanical properties of the cortex and the amount  
388 and timing of relaxation at each pole. Any non-uniformity, for example due to cell-cell contacts, could  
389 lead to unstable positioning or collapse of the ring to one side (Greenspan, 1978). Similarly, mechanisms  
390 that promote cortical contractility at the cell equator could initiate ingression; however, in the absence of  
391 cortical relaxation, cytokinesis would stall due to progressively increasing cortical tension. Coupling  
392 equatorial contractility to polar relaxation, as we observe in the *C. elegans* embryo, has two beneficial  
393 effects: (1) it releases the isotropic tension produced by compression of the equatorial cortex along the  
394 direction perpendicular to the ring, leading to filament alignment and ring narrowing that reduces  
395 resistance from cytoplasmic pressure and, (2) it allows the ring to establish a pattern of ring-directed  
396 cortical flow to generate a feedback loop that provides components to the ring in proportion to the  
397 velocity of cortical flow rather than the rate of network turnover.

398         Information on constriction kinetics and patterning of cortical compression/expansion suggests  
399 that a similar coupling may also support ring constriction in sea urchin embryos. Cleaving sea urchin  
400 embryos from a variety of species exhibit constriction kinetics essentially identical to those during the first

401 division of the *C. elegans* embryo (Mabuchi, 1994). Pioneering work by Katsuma Dan monitoring surface  
402 expansion and compression by measuring the distance between surface-adhered particles and the  
403 distribution of pigmented cortex-associated granules (Dan, 1954; Dan & Dan, 1940; Dan, Dan, &  
404 Yanagita, 1938), suggests that sea urchin embryos also exhibit patterned relaxation during ring  
405 constriction. However, rather than being confined to the pole as it is in the *C. elegans* embryo,  
406 compression of the equatorial cortex is coupled to a wave of cortical expansion that initiates at the poles  
407 and propagates through to the region adjacent to the furrow (Dan et al., 1938; Dan & Ono, 1954; Dan,  
408 Yanagita, & Sugiyama, 1937; Swann & Mitchison, 1958), a result recently confirmed by experiments  
409 employing a probe that binds lipid rafts (Gudejko et al., 2012). Cortical compression and expansion have  
410 not been mapped in vertebrate cells; however, monitoring of fluorescent latex spheres adhered to cell  
411 surface proteins (Fishkind et al., 1996; Wang et al., 1994), injected stabilized fluorescent actin filaments  
412 (Cao & Wang, 1990), and fluorescently labeled myosin II (DeBiasio et al., 1996) have all revealed  
413 concerted cortical flow towards the division plane in the equatorial region of the cell that contrasted with  
414 random surface movements at the cell poles, suggesting a pattern similar to the one we describe here for  
415 the *C. elegans* embryo.

416

### 417 ***The CoFFee model as a tool to dissect the consequences of molecular perturbations***

418 The ability to analyze the effects of mutations and other molecular perturbations is essential to  
419 defining molecular mechanisms. The exponential accumulation of contractile ring components during  
420 constriction due to positive feedback means that the properties of the ring (component levels and  
421 constriction rate) are continuously changing. The existence of the feedback loop can also to somewhat  
422 counterintuitive results—for example, perturbations that increase the difficulty of ring constriction delay  
423 constriction onset rather than slowing constriction kinetics. Deconvolving the phenotypes observed  
424 following specific perturbations therefore poses a significant challenge. To address this challenge, we  
425 generated a straightforward analytical mathematical formulation (the CoFFee model) consisting of three  
426 differential equations and three parameters that reflect the empirical properties of the ring and cortex. In  
427 addition to describing the processes underlying the evolution of the contractile ring, the CoFFee model

428 provides a simple framework for analyzing experimental data. As we demonstrate here for rho kinase  
429 depletion, assessing the effects of a perturbation on model parameters provides insights into the  
430 underlying mechanistic effects of the perturbation. For example, the analysis of rho kinase depleted  
431 embryos suggests that reducing the concentration of cortical myosin leads to a compensatory increase in  
432 cortical flow that restores ring myosin to control levels—we note that the reason for this compensation is  
433 a fascinating topic for future work. Since the CoFFee model encapsulates experimental data to  
434 accurately describe the dynamics of the contractile ring and associated cortical network, an additional  
435 interesting future direction will be to use parameter changes derived from the CoFFee model as input for  
436 a finite-element model (similar to (Turlier et al., 2014)) in order to predict the evolution of cell shape given  
437 an *a priori* knowledge of cortical and contractile ring dynamics.

438



439 **METHODS**

440 ***C. elegans* strains used in this study**

| Strain Name | Genotype                                                                                                                                                                               | Reference                                            |
|-------------|----------------------------------------------------------------------------------------------------------------------------------------------------------------------------------------|------------------------------------------------------|
| OD821       | <i>ItSi200</i> [pOD1997; <i>Pnmy-2::nmy-2::gfp</i> ; <i>cb-unc-119(+)</i> II; <i>unc-119(ed3)</i> III                                                                                  | This study                                           |
| OD857       | <i>ItSi200</i> [pOD1997; <i>Pnmy-2::nmy-2::gfp</i> ; <i>cb-unc-119(+)</i> II; <i>unc-119(ed3)</i> ; <i>ruls32</i> [pAZ132; <i>pie-1/GFP::histone H2B</i> ] III                         | This study                                           |
| OD858       | <i>ItSi803</i> [pOD1998; <i>Parx-7::GFP::arx-7</i> ; <i>cb-unc-119(+)</i> II; <i>unc-119(ed3)</i> III;                                                                                 | This study                                           |
| LP162       | <i>nmy-2(cp13[nmy-2::gfp + LoxP]) I</i>                                                                                                                                                | (Dickinson et al., 2013)                             |
| OD95        | <i>unc-119(ed3)</i> III; <i>ItIs37</i> [pAA64; <i>Ppie-1::mCherry::his-58</i> ; <i>unc-119(+)</i> ] IV; <i>ItIs38</i> [pAA1; <i>Ppie-1::GFP::PH(PLC1delta1)</i> ; <i>unc-119 (+)</i> ] | (Essex, Dammermann, Lewellyn, Oegema, & Desai, 2009) |
| OD3011      | <i>ItSi1123</i> [pSG017; <i>Pani-1::GFP::ani-1 RE-encoded-exon5::ani-1 3'-UTR</i> ; <i>cb unc-119(+)</i> ]II; <i>unc-119(ed3)</i> III                                                  | This study                                           |
| GOU2047     | <i>cas607</i> [ <i>arx-2::gfp knock-in</i> ] V                                                                                                                                         | (Zhu et al., 2016)                                   |

441

442 The *C. elegans* strains listed in the table were maintained at 20°C using standard methods. OD821  
443 and OD858, expressing NMY-2::GFP, GFP::anillin, and GFP::ARX-7 were generated using a  
444 transposon-based strategy (MosSCI; (Frokjaer-Jensen et al., 2008)). Genomic regions encoding *nmy-2*  
445 (including 2079 bp and 1317 bp up and downstream of the stop codon, respectively), *ani-1* (including  
446 2015 bp and 1215 bp up and downstream of the stop codon), and *arx-7* (including 3056 bp and 634 bp  
447 up and downstream of the stop codon) were cloned into pCFJ151 and sequences encoding GFP were  
448 inserted either just before (*nmy-2*) or after (*arx-7* and *ani-1*) the start codon. The single copy *nmy-2*  
449 transgene was generated by injecting a mixture of repairing plasmid (pOD1997, 50ng/μL), transposase  
450 plasmid (pJL43.1, Pglh-2::Mos2 transposase, 50ng/μL), and fluorescence selection markers (pGH8,  
451 Prab-3::mCherry neuronal, 10ng/μL; pCFJ90, Pmyo-2::mCherry pharyngeal, 2.5ng/μL; pCFJ104, Pmyo-  
452 3::mCherry body wall, 5ng/μL) into EG6429 (ttTi5605, Chr II). Single copy *ani-1* and *arx-7* transgenes  
453 were generated by injecting a mixture of repairing plasmid (pSG017 (*ani-1*) or pOD1998 (*arx-7*),  
454 50ng/μL), transposase plasmid (CFJ601, Peft-3::Mos1 transposase, 50ng/μL), selection markers (same  
455 as for *nmy-2* strain) and an additional negative selection marker (pMA122; Phsp-16.41::peel-1, 10ng/μL)



456 into EG6429 (ttTi5605, Chr II). After one week, progeny of injected worms were heat-shocked at 34°C for  
457 2-4 hours to induce PEEL-1 expression and kill extra chromosomal array containing worms (Seidel et al.,  
458 2011). Moving worms without fluorescent markers were identified and transgene integration was  
459 confirmed in their progeny by PCR spanning both homology regions in all strains.

460

### 461 **C. elegans RNA-mediated interference**

| Gene                         | Oligonucleotide 1                               | Oligonucleotide 2                                | Template | mg/ml |
|------------------------------|-------------------------------------------------|--------------------------------------------------|----------|-------|
| <i>arx-2</i><br>(K07C5.1)    | TAATACGACTCACTA<br>TAGGTCAGCTTCGTC<br>AAATGCTTG | AATTAACCCTCACTA<br>AAGGTGCAATACGC<br>GATCCAAATA  | N2 DNA   | 1.7   |
| <i>let-502</i><br>(C10H11.9) | TAATACGACTCACTA<br>TAGGCAGCGATCGT<br>CTGCTTATCA | AATTAACCCTCACTA<br>AAGGTGGCTGTCTGA<br>GTTACGAATG | N2 DNA   | 1.9   |

462

463 Single-stranded RNAs (ssRNAs) were synthesized in 50µL T3 and T7 reactions (MEGAscript,  
464 Invitrogen, Carlsbad, CA) using cleaned DNA templates generated by PCR from N2 DNA using the  
465 oligos in the table above. Reactions were cleaned using the MEGAclean kit (Invitrogen, Carlsbad, CA),  
466 and the 50 µL T3 and T7 reactions were mixed with 50µL of 3× soaking buffer (32.7mM Na<sub>2</sub>HPO<sub>4</sub>,  
467 16.5mM KH<sub>2</sub>PO<sub>4</sub>, 6.3mM NaCl, 14.1mM NH<sub>4</sub>Cl), denatured at 68°C for 10min, and then annealed at  
468 37°C for 30 min to generate dsRNA. L4 hermaphrodite worms were injected with dsRNA and allowed to  
469 recover at 16°C for 44-50 hours prior to imaging.

470

### 471 **Monitoring cortical flow**

472 Cortical flow was monitored in images of the cortical surface in embryos expressing myosin::GFP  
473 obtained from adult hermaphrodites by dissection. Embryos were mounted followed by sealing with a  
474 coverslip on double thick (1 mm) low percentage agarose (0.5%) pads to prevent compression that  
475 biases the initial angle of furrow ingression (**Figure 1 – Figure Supplement 2**). Images were acquired on  
476 an inverted microscope (Axio Observer.Z1; Carl Zeiss) equipped with a spinning-disk confocal head  
477 (CSU-X1; Yokogawa) and a 63× 1.40 NA Plan Apochromat lens (Zeiss) using a Hamamatsu Orca-ER  
478 digital camera (Model C4742-95-12ERG, Hamamatsu photonics). Images were collected using custom  
479 software, written in Python, that utilizes the Micro-Manager (open source software, (Edelstein et al.,

2014)) microscope control library. A 3 x 0.75  $\mu\text{m}$  z-series was collected (400ms exposure, 10-20% laser power) every 2s. After 15 time points, a 15 x 1 $\mu\text{m}$  z-stack, offset by 3 $\mu\text{m}$  from the cortical surface, was imaged to monitor the position of the closing contractile ring. The entire imaging series was repeated every 36s until the end of cytokinesis. Cortical flow was measured in maximum intensity projections of the 3 x 0.75 $\mu\text{m}$  z-stacks of the cortical surface, after orientation of the images to place the embryo anterior at the top and the posterior at the bottom, by correlating myosin fluorescence between consecutive images using Gunnar Farneback's algorithm (Farneback, 2003) implemented within the openCV library with a 30-pixel window size. The threshold was calculated for every image by maximizing the ratio of total intensity inside a 200x350 pixel box positioned in the center of the embryo to the total intensity outside that box.

490

#### 491 ***Measurement of contractile ring position and size***

492 Automated methods were employed to identify the edges of the embryo, determine the position of  
493 the contractile ring, and reconstruct the rings for each time point in an end-on view to determine the initial  
494 ingression axis (**Figure 1 – Figure Supplement 3**). Ring size and position were determined using  
495 custom Python software that: (1) identifies the orientation of the anterior-posterior (AP) axis and rotates  
496 the embryo to place the embryo anterior at the top and the embryo posterior at the bottom, (2) finds the  
497 embryo center in different x-z planes along the AP axis and calculates embryo radius, and (3) calculates  
498 the radius of the contractile ring and determines its position within the division plane. Details of each step  
499 are outlined below.

500 Orienting embryos with their anterior end to the top: Acquired z-plane images were convolved with a  
501 10-pixel Gaussian kernel to reduce noise. An optimal signal threshold that partitioned the embryo interior  
502 from exterior was identified by finding a local minimum in the intensity histogram that produced a binary  
503 mask with expected area ( $\sim 120000 \pm 50000$  pixel<sup>2</sup>). The orientation of the AP axis was identified by fitting  
504 an ellipse to the thresholded area in the middle plane of the z stack. The anterior side was identified by  
505 higher cortical myosin fluorescence and all images were rotated to place the embryo anterior at the top of  
506 the image and the embryo posterior at the bottom.

507 Defining the central axis of embryo and determining embryo width: The central axis of the embryo  
508 was defined by drawing a horizontal line across the oriented embryo at the midpoint between its anterior  
509 and posterior ends and identifying the first and last points along this line with signal above the threshold  
510 for each z-plane. The identified pixels were virtually projected in an end-on (x-z) view and fit to a circle by  
511 minimizing residuals. To account for fluctuations in the embryo boundary due to noise and fluorescence  
512 variation, the procedure was repeated 9 more times after shifting the position of the horizontal line  
513 towards the anterior pole by 10 pixels, covering approximately 1/5 of the embryo length (500 pixels). The  
514 position of the AP axis and the radius of the embryo were determined by averaging the 10  
515 measurements.

516 Measuring contractile ring size and position: As illustrated for the central plane images shown in  
517 Figure 1 – Figure Supplement 3, the position of the contractile ring was determined by identifying pairs of  
518 points with the highest myosin fluorescence intensity on the opposite edges of the embryo in each z-  
519 plane that were not more than 20 pixels apart in the horizontal direction and were located at a y-axis  
520 position near the embryo middle. Contractile ring radius and position were determined by projecting the  
521 points to generate an end-on (x-z) view and fitting the data with a circle. The ring fit was iteratively  
522 improved by calculating predicted positions of myosin fluorescence at the ring in each z-plane using  
523 initially fitted parameters. Intensity maxima within 5 pixels of the predicted location were identified and  
524 the ring was refit. The initial guesses for the contractile ring size and position at the next time point were  
525 estimated from the previously calculated ring values. The algorithm restricted ring position fluctuations to  
526 20 pixels along anterior-posterior axis and the size was estimated assuming constant rate of ring  
527 constriction. The automatic ring measurements were manually confirmed for each embryo. The initial  
528 ingress axis was determined as illustrated (**Figure 1 – Figure Supplement 3**) by fitting a line through  
529 the centers of the rings with a normalized ring size ( $\bar{R} := R/R_{emb}$ ) > 0.3.

530

### 531 ***Embryo time alignment for averaging***

532 Sequences from individual embryos were time aligned by defining zero time ( $t_0$ ) and the total time  
533 of cytokinesis ( $t_{CK}$ ) for each embryo, and normalizing time by  $t_{CK}$  prior to averaging,  $\hat{t} := \frac{t-t_0}{t_{CK}}$ . An initial

534 determination of  $t_0$  and  $t_{CK}$  was made by fitting a line to the plot of normalized ring size ( $\bar{R}(t) := R/R_{emb}$ )  
535 versus time between 30% and 80% closure for each embryo as outlined in Figure 1a. Extrapolation of  
536 this line for each embryo defined  $t_0$  as the time where the fitted line intersects 1, and the time of  
537 cytokinesis,  $t_{CK}$  as the time where the fitted line intersects 0. Due to the small number of measurements  
538 from each embryo available for fitting (3-5 values where  $0.8 > \bar{R} > 0.3$ ), the values of  $t_0$  and  $t_{CK}$  were  
539 refined by fitting  $\bar{R}(\hat{t})$  for each embryo to the average dimensionless ring size,  $\langle \bar{R} \rangle(\hat{t})$ . Calculation of  
540 the average dimensionless ring size was performed in iterative manner. The time for each embryo was  
541 aligned by  $t_0$  and normalized by  $t_{CK}$  using estimates from the fitted line in the first iteration. The average  
542 dimensionless ring size ( $\langle \bar{R} \rangle(\hat{t})$ ) was calculated by averaging normalized ring sizes of all embryos at  
543 corresponding normalized time. Contractile ring size was approximated for intermediate time points by  
544 linear interpolation. In further iterations,  $t_0$  and  $t_{CK}$  were refined for every embryo by minimizing the  
545 residuals between its normalized ring size,  $\bar{R}(\hat{t})$ , and the average dimensionless ring size,  $\langle \bar{R} \rangle(\hat{t})$ ,  
546 throughout the entire timecourse of cytokinesis, thus increasing the number of time points available for  
547 fitting  $t_0$  and  $t_{CK}$  (6-10 values per embryo). After refining time alignment and normalization for each  
548 embryo, average dimensionless ring size was re-calculated and  $t_0$  and  $t_{CK}$  were refined for each embryo  
549 again. The refinement process was repeated until changes in average dimensionless ring size,  $\langle \bar{R} \rangle$   
550 ( $\hat{t}$ ), were smaller than 0.001 on average (achieved within a few iterations). The collective fitting of all  $t_0$   
551 and  $t_{CK}$  at every iteration was performed under restriction that the line fit through  $\langle \bar{R} \rangle(\hat{t})$  between 0.8  
552 and 0.3 intercepted 0 at  $\hat{t} = 0$  and 1 at  $\hat{t} = 1$ . This restriction ensured that  $t_0$  and  $t_{CK}$  determined from fits  
553 of individual embryos to the average ring size would be consistent with their original definition. The  
554 dimensional ring kinetics,  $\langle R \rangle(t)$ , can be recovered using the following equation

$$\langle R \rangle(t) = \langle R_{emb} \rangle \langle \bar{R} \rangle(\hat{t} \langle t_{CK} \rangle), \quad (9)$$

555 where  $\langle R_{emb} \rangle = 14.7 \pm 0.7 \mu m$  and  $\langle t_{CK} \rangle = 200 \pm 30 s$  are average embryo radius and time of  
556 cytokinesis accordingly.

557  
558 **Cortical flow averaging**

559 Cortical flow averaging was performed after spatial and temporal alignment of data collected in  
560 different embryos (n=93 embryos from 93 worms filmed over the course of 5 days for control, **Video 2**;  
561 n=68 embryos from 68 worms filmed over the course of 4 days for *arx-2(RNAi)*, **Video 3**). The number of  
562 embryos was chosen to achieve at least 10-fold coverage for all areas of the cortical map for controls  
563 and 5-fold coverage for *arx-2(RNAi)*. Linear interpolation was used to approximate the flow between  
564 consecutive time points. Because our imaging regime required periodic z-stack acquisition to determine  
565 the trajectory of ring closure, no flow approximation was done during those time periods (~6s gap every  
566 30s). The flow data for each time point was represented as a set of vectors with direction and magnitude  
567 corresponding to the direction and magnitude of the cortical flow at the base of the vector. The base of  
568 each vector had two spatial coordinates:  $x$ , the position along the anterior-posterior axis (where the  
569 position of the contractile ring was defined as 0), and  $\theta$ , the angular position relative to the initial  
570 ingress axis (defined as described in **Figure 1A** and **Figure 1 – Figure Supplement 3**). We note that  
571 mitotic exit is accompanied by a brief (~50-60s) period of rotational flow ((Naganathan, Furthauer,  
572 Nishikawa, Julicher, & Grill, 2014; Schonegg, Hyman, & Wood, 2014); see **Video 1**), which dissipates  
573 soon after initiation of cytokinesis ( $\sim\hat{t}=0.2-0.3$ ). As this rotational contribution is not relevant here, we  
574 removed it by averaging the data from the right and left halves of the embryo (in an end-on view),  
575 allowing us to focus on rotation-independent flows. Thus the flow with angular positions greater than 180  
576 degrees was mirrored in angular direction

$$f_{\theta}(\hat{t}, x, \theta > 180) \rightarrow -f_{\theta}(\hat{t}, x, 360 - \theta), \quad (10)$$

577  $f_{\theta}$  is the angular component of the flow vector  $\vec{f}$ . The flows were normalized by the embryo size and  
578 cytokinesis rate  $\vec{f}(\hat{t}, x, \theta) := \frac{t_{CK}}{R_{emb}} \vec{f}(\hat{t}, x, \theta)$  and averaged according to its position and time

$$\langle \vec{f} \rangle(\hat{t}, x, \theta) = \frac{\sum_{emb} \vec{f}(\hat{t}, x, \theta)}{N_{emb}}. \quad (11)$$

579  
580 **Calculation of expected cortical surface flow profiles**

581 To aid in the interpretation of experimental results, expected profiles for cortical surface movement were  
582 calculated for defined patterns of cortical surface increase and plotted (**Figure 1B and Figure 1 – Figure**  
583 **Supplement 5**). The general form of surface movement velocity is given by the following equation

$$v(x) = \int_0^x g(x')dx' + u, \quad (12)$$

584 where  $g(x)$  is the amount surface gain and  $u$  is the velocity of asymmetric ring movement, which could  
585 be positive or negative, depending on whether the ring is moving towards or away from the surface.  
586 From equation (12) we obtain the following predictions

587 Uniform surface increase:  $v(x) = Cx + u$ ;

588 Polar surface increase:  $v(x) = C + u$ ;

589 Behind the ring surface increase:  $v(x) = u$  (if the asymmetry of cytokinetic furrowing arises due to  
590 global surface movement) or  $v(x) = 0$  (if the asymmetry in surface increase is related to the asymmetric  
591 furrowing).

592

### 593 **Cortical laser ablation**

594 Cortical laser ablations, presented in Figure 2, were performed using a robotic laser microscope  
595 system (RoboLase) (Botvinick & Berns, 2005). Embryos expressing myosin::GFP were mounted using  
596 standard procedures. A cortical cut, approximately 10  $\mu\text{m}$  long, was made on the anterior side of the  
597 embryo when the ring was at ~50% closure (7 $\mu\text{m}$  radius). The cut was confirmed by comparison of  
598 cortical fluorescence images before and after the cut and was considered successful if the foci moved  
599 away from the cut area (~3.5 $\mu\text{m}$  distance), indicating cortical tension release. Contractile ring closure  
600 rate was calculated by measuring the difference in ring sizes before and after the cut, assessed from two  
601 4x2 $\mu\text{m}$  z-stacks acquired immediately before the cut and 13s later. Errors in measuring the radius at the  
602 two timepoints were determined from the procedure used to fit the data to a circle and were propagated  
603 to determine the errors in the constriction rate measurements for individual embryos; mean errors are  
604 S.E.M. The cortical opening after ablation was approximately 35 $\mu\text{m}^2$ ; this translates into an additional  
605 reduction in ring radius by ~0.8 $\mu\text{m}$ , if the cortical surface tension dominates the ring closure rate. This  
606 additional decrease in ring size within 13s should correspond to increase of the control rate (0.22 $\mu\text{m/s}$ )

607 by ~30% (0.06 $\mu$ m/s). The experiment was repeated 19 times for no cut condition, 14 times for parallel  
608 cut, and 15 times for perpendicular cut. All imaging was performed over the course of 5 days. The  
609 number of embryos was chosen to achieve sufficient accuracy in the determination of mean ring closure  
610 rates to assess whether it was altered by the cuts.

611

### 612 **Calculation of the surface area flowing into the division plane**

613 We calculated the amount of surface area flowing into the division plane from flow measurements  
614 made 7  $\mu$ m away from the position of the furrow on the anterior and posterior sides (as illustrated in  
615 **Figure 3A**). The rate of the surface flow is

$$\frac{dA_{surf}}{d\hat{t}}(\hat{t}) = 2R_{emb} \int_0^\pi \langle \vec{f} \rangle(\hat{t}, x_0, \theta) d\theta, \quad (13)$$

616 where  $x_0$  is -7  $\mu$ m and 7  $\mu$ m for the rate of flow from the anterior or the posterior sides, respectively. The  
617 total amount of surface area that entered the division plane from any time  $\bar{t}_0$  to  $\bar{t}$  is obtained by  
618 integrating equation (13) over time

$$A_{surf}(\hat{t}) = \int_{\hat{t}_0}^{\hat{t}} \left. \frac{dA_{surf}}{d\hat{t}} \right|_{ant} + \left. \frac{dA_{surf}}{d\hat{t}} \right|_{post} (t') dt'. \quad (14)$$

619 The increase in area of the division plane was calculated as following

$$A_{div\ plane}(\hat{t}) = 2\pi(\langle R \rangle^2(\hat{t}_0) - \langle R \rangle^2(\hat{t})). \quad (15)$$

620 In Figure 3A we used  $\hat{t}_0 = -0.2$ . The extra cortex delivered into the ring can be inferred from the  
621 difference between the surface area entering the division plane and the area of the division plane

$$A_{flow}(\hat{t}) := A_{surf}(\hat{t}) - A_{div\ plane}(\hat{t}). \quad (16)$$

622

### 623 **Division plane imaging**

624 For quantification of myosin::GFP and GFP::anillin amounts in the contractile ring, adult worm  
625 dissection and one-cell stage embryos imaging was performed in a custom microdevice (Carvalho et al.,  
626 2011). The device was mounted on an inverted microscope (Axio Observer.Z1; Carl Zeiss) and embryos  
627 were imaged with a 63x1.4NA Plan Achromat objective using an electron-multiplying charge-coupled



628 device camera (QuantEM:512SC, Photometrics; 100ms exposure, EM gain set to 500, 10% laser  
629 power). Division planes were reconstructed from 40 x 0.5µm z-stacks collected every 30s after  
630 background subtraction and attenuation correction. All imaging was done at 20°C.

631

### 632 ***Contractile ring photo-bleaching and imaging***

633 1-cell stage embryos were mounted in microdevices as for division plane imaging and 4-cell stage  
634 embryos were mounted on slides with 2% agarose pads. Embryos were imaged on a Nikon TE2000-E  
635 inverted microscope equipped with a 60x1.40NA objective, an EM-CCD camera (iXon; Andor  
636 Technology; EM-Gain=220, Exposure =100ms), and a krypton-argon 2.5 W water-cooled laser. For 1-cell  
637 stage embryos, division planes were reconstructed from 30x1µm stacks acquired every 20s with 20%  
638 laser power and photo-bleaching was performed by 2 sweeps of a 488nm laser with 100% power and  
639 500µs dwell time. For 4-cell stage embryos, division planes were reconstructed from 16x1µm stacks  
640 acquired every 10s with 50% laser power and photo-bleaching was performed by 2 sweeps of a 488nm  
641 laser with 100% power and 100µs dwell time. For 4-cell stage embryos, the time between the  
642 prebleached and first postbleached images was 6s.

643

### 644 ***Estimation of depth attenuation***

645 To estimate depth attenuation within the division plane, we quantified the intensity of the division  
646 plane in two cell embryos expressing a GFP-tagged probe expected to be uniformly present on the  
647 plasma membrane. From each image, we subtracted a background intensity calculated as the average  
648 value inside two 4x4 µm rectangles positioned 2 µm away from the division plane inside the anterior and  
649 posterior cells. The division plane intensity profile was obtained by performing a 30 pixel maximum  
650 intensity projection along the AP axis, with the division plane positioned approximately in the middle  
651 (**Figure 3 – Figure Supplement 4**). The intensity profiles in z from 13 embryos were fitted to an  
652 exponential using the same characteristic attenuation depth for all embryos

$$I = I_0 e^{-z/z_{att}}, \quad (17)$$

653 which yielded a characteristic depth of attenuation,  $z_{att}$ , of 15 µm.



654

655 ***Quantification of myosin and anillin intensity in the contractile ring and on the cortex***

656 For embryos at the 1-cell stage, myosin::GFP and GFP::anillin intensities in the contractile ring and  
657 on the cortex were quantified in 40x0.5  $\mu\text{m}$  z-stacks containing the ring after correction for depth  
658 attenuation and subtraction of background fluorescence. Average intensity along the ring was calculated  
659 across a set of embryos in 30 degree arcs (for myosin::GFP, n=36 embryos from 18 worms filmed over 5  
660 days for controls and 24 embryos from 15 worms filmed over 5 days for *let-502(RNAi)*; for anillin::GFP,  
661 n= 26 embryos from 14 worms filmed over 4 days and 30 embryos from 18 worms filmed over the course  
662 of 4 days for *let-502(RNAi)*). The number of embryos was chosen to determine mean fluorescence with  
663 sufficient accuracy to derive appropriate conclusions. Positions along the ring were referenced based on  
664 the angle between the line from the position on the ring to the ring center and the initial ingression axis.  
665 Linear interpolation in time was used for every embryo to estimate intensity in the intermediate time  
666 points to perform averaging. Measured intensities were divided by arc length and averaged between  
667 different embryos to obtain mean GFP fluorescence per unit length for different angular ranges and the  
668 average for all angles. Total ring GFP fluorescence was calculated by integrating over ring perimeter.  
669 Cortical intensities were quantified by choosing the time point with the ring size closest to  $\bar{R} = 0.8$  and  
670 measuring total fluorescence in the 15<sup>th</sup> plane after correction for depth attenuation and subtraction of  
671 background fluorescence.

672 Measurements of myosin::GFP fluorescence in the ring at the 4-cell stage were performed as  
673 described in Carvalho et. al., 2009. However background fluorescence was determined as the mean  
674 fluorescence within a variable size circle at least 10 pixels in diameter, instead of fixed at 10 pixels, to  
675 improve measurement quality.

676

677 ***Derivation of the Cortical Flow Feedback (CoFFee) model for cytokinesis***

678 The CoFFee model formalizes the following conceptual view of cytokinesis: Active RhoA recruits  
679 contractile ring components to the equatorial cortex, where myosin engages with actin to exert an  
680 isotropic force that compresses the underlying cortex. Polar relaxation releases tension in the direction  
681 perpendicular to the ring, but not in the around-the-ring direction, generating anisotropic boundary

682 conditions that cause the system to exhibit distinct behavior in the two directions. Disassembly in the  
 683 around-the-ring direction reduces ring components in proportion to the reduction in length, and does not  
 684 alter the per unit length amount of myosin. Thus, changes in myosin levels are determined solely by ring-  
 685 directed cortical flow along the direction perpendicular to the ring, which can be solved as a one-  
 686 dimensional problem. We assume that the cortical compression rate (between  $x$  and  $x + dx$ ) is  
 687 proportional to local myosin concentration,  $m(x, t)$ , which exerts stress onto the actin network resulting in

$$\frac{\delta \varepsilon}{\delta t}(x, t) = -\alpha m(x, t), \quad (18)$$

688 where  $\varepsilon$  is the cortical strain (i.e. change in length of cortical surface per unit length) and  $\alpha$  is a  
 689 proportionality constant that reflects the ability of the cortex to be compressed by ring myosin. The  
 690 velocity of cortical surface movement is obtained from the following relationship (see also equation (12)).

$$v(x, t) = \int_0^x \frac{\delta \varepsilon}{\delta t}(x', t) dx'. \quad (19)$$

691 The conservation of mass for myosin flow results in the following

$$\frac{\partial m}{\partial t}(x, t) = -\frac{\partial}{\partial x}(m(x, t)v(x, t)) = \frac{\partial}{\partial x}(m(x, t) \int_0^x \alpha m(x', t) dx'). \quad (20)$$

692 If we integrate equation (20) over  $x$  on  $(-w, w)$  domain we obtain

$$dM_{ring}(t)/dt = \alpha m_{cort} M_{ring}(t), \quad (21)$$

693 where  $M_{ring}(t) := \int_{-w}^w m(x, t) dx$  is the total per unit length amount of engaged ring myosin,  $2w$  is the  
 694 width of the contractile ring/active zone where myosin is engaged and compressing cortex and  $m_{cort} :=$   
 695  $m(w, t)$  is the concentration of myosin on the cortex delivered into the contractile ring. The velocity of  
 696 ring-directed cortical flow is

$$v_{flow}(t) = \alpha M_{ring}(t)/2, \quad (22)$$

697 The one half is included to account for the fact that flow comes in from both sides. The solution of  
 698 equation (21) is

$$M_{ring}(t) = M_{0\ ring} e^{t/\tau}, \quad (23)$$

699 where we define the characteristic time of myosin accumulation,  $\tau$ , as  $\frac{1}{\alpha m_{cort}}$ . Note that the total amount  
 700 of myosin in the ring will be the amount of engaged myosin plus an added baseline that would include  
 701 any myosin not involved in compression (see equation (5)). We assume the rate of ring shrinkage is  
 702 proportional to the amount of ring myosin, as observed in our data,

$$\frac{1}{R} \frac{dR}{dt} = -\beta M_{ring}(t), \quad (24)$$

703 where  $\beta$  is a proportionality coefficient that reflects the ability of the ring to be constricted by ring myosin.  
 704 Using equations (23) and (24), we obtain the dynamics of contractile ring size over time

$$\bar{R}(t) = \bar{R}_{ini} e^{-\beta \tau M_{0\ ring} \exp(t/\tau)}, \quad (25)$$

705 where  $\bar{R}_{ini}$  is the dimensionless characteristic size of the ring; essentially the radius at minus infinity if the  
 706 same exponential process controlling contractile ring assembly extended back in time infinitely. Instead,  
 707 *in vivo* cytokinesis initiates when spindle-based signaling activates RhoA on the equatorial cortex leading  
 708 to the abrupt recruitment of contractile ring components. If the time frame of reference is chosen so that  
 709  $t = 0$  is cytokinesis onset immediately following the initial patterning of the cortex by RhoA,  $M_{0\ ring}$  is the  
 710 amount of ring myosin immediately following this event and the initial size of the ring is

$$\bar{R}_0(t) = \bar{R}_{ini} e^{-\beta \tau M_{0\ ring} t}. \quad (26)$$

711 To compare our model with data we use the time frame of reference where  $t = 0$  is the point of 50%  
 712 closure (i.e.  $\bar{R}(t = 0) = \frac{1}{2}$ ). In this reference,  $M_{0\ ring} = \frac{\ln(\bar{R}_{ini})}{\beta \tau}$ , and by defining dimensionless velocity as  
 713  $\bar{v} := \tau v$ , we obtain equations (4-8). Note that equation (4) can be rewritten in the following way

$$\bar{R}(\bar{t}) = \bar{R}_{ini} e^{-\frac{1}{\bar{R}} \frac{d\bar{R}}{d\bar{t}}}, \quad (27)$$

714 where  $\bar{t} := t/\tau$ . This relationship implies that in this dimensionless time, where  $\bar{R}(\bar{t} = 0) = \frac{1}{2}$ , any two  
 715 rings of the same size have the same dimensionless constriction rate.

716

#### 717 **Data availability**

718 All data is available from the authors upon request.

719 **Code availability**

720 The custom computer code used in this study is freely available from the authors upon request.

721

722 **ACKNOWLEDGEMENTS**

723 This work was supported by a fellowship from the Jane Coffin Childs Memorial Fund to R.N.K. and  
724 grants to M.W.B from AFOSR (FA9550-08-1-0284) and the Beckman Laser Institute Foundation. J.S.G-  
725 C was supported by the University of California, San Diego Cancer Cell Biology Training Program (T32  
726 CA067754). A.D. and K.O. receive salary and other support from the Ludwig Institute for Cancer  
727 Research.

728

## 729 REFERENCES

- 730 Biron, D., Libros, P., Sagi, D., Mirelman, D., & Moses, E. (2004). Biphasic cytokinesis and cooperative  
731 single cell re-production. In A. T. Skejeltorp & A. V. Belushkin (Eds.), *Forces, Growth and Form in*  
732 *Soft Condensed Matter: At the Interface between Physics and Biology* (pp. 217-234): Springer,  
733 Berlin.
- 734 Bluemink, J. G., & de Laat, S. W. (1973). New membrane formation during cytokinesis in normal and  
735 cytochalasin B-treated eggs of *Xenopus laevis*. I. Electron microscope observations. *J Cell Biol*,  
736 *59*(1), 89-108.
- 737 Botvinick, E. L., & Berns, M. W. (2005). Internet-based robotic laser scissors and tweezers microscopy.  
738 *Microsc Res Tech*, *68*(2), 65-74. doi:10.1002/jemt.20216
- 739 Bourdages, K. G., Lacroix, B., Dorn, J. F., Descovich, C. P., & Maddox, A. S. (2014). Quantitative  
740 analysis of cytokinesis in situ during *C. elegans* postembryonic development. *PLoS One*, *9*(10),  
741 e110689. doi:10.1371/journal.pone.0110689
- 742 Byers, T. J., & Armstrong, P. B. (1986). Membrane protein redistribution during *Xenopus* first cleavage. *J*  
743 *Cell Biol*, *102*(6), 2176-2184.
- 744 Calvert, M. E., Wright, G. D., Leong, F. Y., Chiam, K. H., Chen, Y., Jedd, G., & Balasubramanian, M. K.  
745 (2011). Myosin concentration underlies cell size-dependent scalability of actomyosin ring  
746 constriction. *J Cell Biol*, *195*(5), 799-813. doi:10.1083/jcb.201101055
- 747 Canman, J. C., Hoffman, D. B., & Salmon, E. D. (2000). The role of pre- and post-anaphase  
748 microtubules in the cytokinesis phase of the cell cycle. *Curr Biol*, *10*(10), 611-614.
- 749 Cao, L. G., & Wang, Y. L. (1990). Mechanism of the formation of contractile ring in dividing cultured  
750 animal cells. II. Cortical movement of microinjected actin filaments. *J Cell Biol*, *111*(5 Pt 1), 1905-  
751 1911.
- 752 Carvalho, A., Desai, A., & Oegema, K. (2009). Structural memory in the contractile ring makes the  
753 duration of cytokinesis independent of cell size. *Cell*, *137*(5), 926-937.  
754 doi:10.1016/j.cell.2009.03.021
- 755 Carvalho, A., Olson, S. K., Gutierrez, E., Zhang, K., Noble, L. B., Zanin, E., . . . Oegema, K. (2011).  
756 Acute drug treatment in the early *C. elegans* embryo. *PLoS One*, *6*(9), e24656.  
757 doi:10.1371/journal.pone.0024656
- 758 Chaudhuri, O., Parekh, S. H., & Fletcher, D. A. (2007). Reversible stress softening of actin networks.  
759 *Nature*, *445*(7125), 295-298. doi:10.1038/nature05459
- 760 Dan, K. (1954). The cortical movement in *Arbacia Punctulata* eggs through cleavage cycles.  
761 *Embryologia*, *2*(12), 115-122.
- 762 Dan, K., & Dan, J. C. (1940). Behavior of the Cell Surface during Cleavage: III. On the formation of New  
763 Surface in the Eggs of *Strongylocentrotus Pulcherrimus*. *Biological Bulletin*, *78*(3), 486-501.
- 764 Dan, K., Dan, J. C., & Yanagita, T. (1938). Behaviour of the Cell Surface During Cleavage. II. *Cytologia*,  
765 *8*, 521-531.
- 766 Dan, K., & Ono, T. (1954). A method of computation of the surface area of the cell. *Embryologia*, *2*, 87-  
767 98.
- 768 Dan, K., Yanagita, T., & Sugiyama, M. (1937). Behavior of the cell surface during cleavage. I.  
769 *Protoplasma*, *28*, 68-81.
- 770 Danilchik, M. V., Bedrick, S. D., Brown, E. E., & Ray, K. (2003). Furrow microtubules and localized  
771 exocytosis in cleaving *Xenopus laevis* embryos. *J Cell Sci*, *116*(Pt 2), 273-283.
- 772 Davies, T., Jordan, S. N., Chand, V., Sees, J. A., Laband, K., Carvalho, A. X., . . . Canman, J. C. (2014).  
773 High-resolution temporal analysis reveals a functional timeline for the molecular regulation of  
774 cytokinesis. *Dev Cell*, *30*(2), 209-223. doi:10.1016/j.devcel.2014.05.009
- 775 DeBiasio, R. L., LaRocca, G. M., Post, P. L., & Taylor, D. L. (1996). Myosin II transport, organization, and  
776 phosphorylation: evidence for cortical flow/solution-contraction coupling during cytokinesis and  
777 cell locomotion. *Mol Biol Cell*, *7*(8), 1259-1282.
- 778 Dickinson, D. J., Ward, J. D., Reiner, D. J., & Goldstein, B. (2013). Engineering the *Caenorhabditis*  
779 *elegans* genome using Cas9-triggered homologous recombination. *Nat Methods*, *10*(10), 1028-  
780 1034. doi:10.1038/nmeth.2641

- 781 Edelstein, A. D., Tsuchida, M. A., Amodaj, N., Pinkard, H., Vale, R. D., & Stuurman, N. (2014). Advanced  
782 methods of microscope control using muManager software. *J Biol Methods*, *1*(2).  
783 doi:10.14440/jbm.2014.36
- 784 Essex, A., Dammermann, A., Lewellyn, L., Oegema, K., & Desai, A. (2009). Systematic analysis in  
785 *Caenorhabditis elegans* reveals that the spindle checkpoint is composed of two largely  
786 independent branches. *Mol Biol Cell*, *20*(4), 1252-1267. doi:10.1091/mbc.E08-10-1047
- 787 Farnebäck, G. (2003). Two-frame motion estimation based on polynomial expansion lecture notes in  
788 computer science (pp. 363-370): Springer Science and Business Media.
- 789 Fededa, J. P., & Gerlich, D. W. (2012). Molecular control of animal cell cytokinesis. *Nat Cell Biol*, *14*(5),  
790 440-447. doi:10.1038/ncb2482
- 791 Fishkind, D. J., Silverman, J. D., & Wang, Y. L. (1996). Function of spindle microtubules in directing  
792 cortical movement and actin filament organization in dividing cultured cells. *J Cell Sci*, *109* ( Pt 8 ),  
793 2041-2051.
- 794 Frokjaer-Jensen, C., Davis, M. W., Hopkins, C. E., Newman, B. J., Thummel, J. M., Olesen, S. P., . . .  
795 Jorgensen, E. M. (2008). Single-copy insertion of transgenes in *Caenorhabditis elegans*. *Nat*  
796 *Genet*, *40*(11), 1375-1383. doi:10.1038/ng.248
- 797 Gardel, M. L., Schneider, I. C., Aratyn-Schaus, Y., & Waterman, C. M. (2010). Mechanical integration of  
798 actin and adhesion dynamics in cell migration. *Annu Rev Cell Dev Biol*, *26*, 315-333.  
799 doi:10.1146/annurev.cellbio.011209.122036
- 800 Green, R. A., Paluch, E., & Oegema, K. (2012). Cytokinesis in animal cells. *Annu Rev Cell Dev Biol*, *28*,  
801 29-58. doi:10.1146/annurev-cellbio-101011-155718
- 802 Greenspan, H. P. (1978). On fluid-mechanical simulations of cell division and movement. *J Theor Biol*,  
803 *70*, 125-134.
- 804 Gudejko, H. F., Alford, L. M., & Burgess, D. R. (2012). Polar expansion during cytokinesis. *Cytoskeleton*  
805 (*Hoboken*), *69*(11), 1000-1009. doi:10.1002/cm.21078
- 806 Hickson, G. R., Echard, A., & O'Farrell, P. H. (2006). Rho-kinase controls cell shape changes during  
807 cytokinesis. *Curr Biol*, *16*(4), 359-370. doi:10.1016/j.cub.2005.12.043
- 808 Hird, S. N., & White, J. G. (1993). Cortical and cytoplasmic flow polarity in early embryonic cells of  
809 *Caenorhabditis elegans*. *J Cell Biol*, *121*(6), 1343-1355.
- 810 Jordan, S. N., & Canman, J. C. (2012). Rho GTPases in animal cell cytokinesis: an occupation by the  
811 one percent. *Cytoskeleton (Hoboken)*, *69*(11), 919-930. doi:10.1002/cm.21071
- 812 Ma, X., Kovacs, M., Conti, M. A., Wang, A., Zhang, Y., Sellers, J. R., & Adelstein, R. S. (2012).  
813 Nonmuscle myosin II exerts tension but does not translocate actin in vertebrate cytokinesis. *Proc*  
814 *Natl Acad Sci U S A*, *109*(12), 4509-4514. doi:10.1073/pnas.1116268109
- 815 Mabuchi, I. (1994). Cleavage furrow: timing of emergence of contractile ring actin filaments and  
816 establishment of the contractile ring by filament bundling in sea urchin eggs. *J Cell Sci*, *107* ( Pt  
817 7 ), 1853-1862.
- 818 Maddox, A. S., Lewellyn, L., Desai, A., & Oegema, K. (2007). Anillin and the septins promote asymmetric  
819 ingression of the cytokinetic furrow. *Dev Cell*, *12*(5), 827-835. doi:10.1016/j.devcel.2007.02.018
- 820 Mandato, C. A., & Bement, W. M. (2003). Actomyosin transports microtubules and microtubules control  
821 actomyosin recruitment during *Xenopus* oocyte wound healing. *Curr Biol*, *13*(13), 1096-1105.
- 822 Martineau, S. N., Andreassen, P. R., & Margolis, R. L. (1995). Delay of HeLa cell cleavage into  
823 interphase using dihydrocytochalasin B: retention of a postmitotic spindle and telophase disc  
824 correlates with synchronous cleavage recovery. *J Cell Biol*, *131*(1), 191-205.
- 825 Matsumura, F. (2005). Regulation of myosin II during cytokinesis in higher eukaryotes. *Trends Cell Biol*,  
826 *15*(7), 371-377. doi:10.1016/j.tcb.2005.05.004
- 827 Mayer, M., Depken, M., Bois, J. S., Julicher, F., & Grill, S. W. (2010). Anisotropies in cortical tension  
828 reveal the physical basis of polarizing cortical flows. *Nature*, *467*(7315), 617-621.  
829 doi:10.1038/nature09376
- 830 Munjal, A., & Lecuit, T. (2014). Actomyosin networks and tissue morphogenesis. *Development*, *141*(9),  
831 1789-1793. doi:10.1242/dev.091645
- 832 Murrell, M., Oakes, P. W., Lenz, M., & Gardel, M. L. (2015). Forcing cells into shape: the mechanics of  
833 actomyosin contractility. *Nat Rev Mol Cell Biol*, *16*(8), 486-498. doi:10.1038/nrm4012



- 834 Naganathan, S. R., Furthauer, S., Nishikawa, M., Julicher, F., & Grill, S. W. (2014). Active torque  
835 generation by the actomyosin cell cortex drives left-right symmetry breaking. *Elife*, 3, e04165.  
836 doi:10.7554/eLife.04165
- 837 Pelham, R. J., & Chang, F. (2002). Actin dynamics in the contractile ring during cytokinesis in fission  
838 yeast. *Nature*, 419(6902), 82-86. doi:10.1038/nature00999
- 839 Piekny, A., Werner, M., & Glotzer, M. (2005). Cytokinesis: welcome to the Rho zone. *Trends Cell Biol*,  
840 15(12), 651-658. doi:10.1016/j.tcb.2005.10.006
- 841 Piekny, A. J., & Mains, P. E. (2002). Rho-binding kinase (LET-502) and myosin phosphatase (MEL-11)  
842 regulate cytokinesis in the early *Caenorhabditis elegans* embryo. *J Cell Sci*, 115(Pt 11), 2271-  
843 2282.
- 844 Reymann, A. C., Staniscia, F., Erzberger, A., Salbreux, G., & Grill, S. W. (2016). Cortical flow aligns actin  
845 filaments to form a furrow. *Elife*, 5. doi:10.7554/eLife.17807
- 846 Rodrigues, N. T., Lekomtsev, S., Jananji, S., Kriston-Vizi, J., Hickson, G. R., & Baum, B. (2015).  
847 Kinetochore-localized PP1-Sds22 couples chromosome segregation to polar relaxation. *Nature*,  
848 524(7566), 489-492. doi:10.1038/nature14496
- 849 Salbreux, G., Charras, G., & Paluch, E. (2012). Actin cortex mechanics and cellular morphogenesis.  
850 *Trends Cell Biol*, 22(10), 536-545. doi:10.1016/j.tcb.2012.07.001
- 851 Schonegg, S., Hyman, A. A., & Wood, W. B. (2014). Timing and mechanism of the initial cue establishing  
852 handed left-right asymmetry in *Caenorhabditis elegans* embryos. *Genesis*, 52(6), 572-580.
- 853 Schroeder, T. E. (1975). Dynamics of the contractile ring. *Soc Gen Physiol Ser*, 30, 305-334.
- 854 Schroeder, T. E. (1990). The contractile ring and furrowing in dividing cells. *Ann N Y Acad Sci*, 582, 78-  
855 87.
- 856 Sedzinski, J., Biro, M., Oswald, A., Tinevez, J. Y., Salbreux, G., & Paluch, E. (2011). Polar actomyosin  
857 contractility destabilizes the position of the cytokinetic furrow. *Nature*, 476(7361), 462-466.  
858 doi:10.1038/nature10286
- 859 Seidel, H. S., Ailion, M., Li, J., van Oudenaarden, A., Rockman, M. V., & Kruglyak, L. (2011). A novel  
860 sperm-delivered toxin causes late-stage embryo lethality and transmission ratio distortion in *C.*  
861 *elegans*. *PLoS Biol*, 9(7), e1001115. doi:10.1371/journal.pbio.1001115
- 862 Selman, G. G., & Perry, M. M. (1970). Ultrastructural changes in the surface layers of the newt's egg in  
863 relation to the mechanism of its cleavage. *J Cell Sci*, 6(1), 207-227.
- 864 Straight, A. F., Cheung, A., Limouze, J., Chen, I., Westwood, N. J., Sellers, J. R., & Mitchison, T. J.  
865 (2003). Dissecting temporal and spatial control of cytokinesis with a myosin II Inhibitor. *Science*,  
866 299(5613), 1743-1747. doi:10.1126/science.1081412
- 867 Swann, M. M., & Mitchison, J. M. (1958). Cleavage in animal cells. *Biological Reviews*, 33(1), 103-135.
- 868 Taber, L. A. (1995). Biomechanics of growth, remodeling, and morphogenesis. *Appl Mech Rev*, 48(8),  
869 487-545.
- 870 Tseng, Y., & Wirtz, D. (2004). Dendritic branching and homogenization of actin networks mediated by  
871 arp2/3 complex. *Phys Rev Lett*, 93(25), 258104. doi:10.1103/PhysRevLett.93.258104
- 872 Turlier, H., Audoly, B., Prost, J., & Joanny, J. F. (2014). Furrow constriction in animal cell cytokinesis.  
873 *Biophys J*, 106(1), 114-123. doi:10.1016/j.bpj.2013.11.014
- 874 Vale, R. D., Spudich, J. A., & Griffis, E. R. (2009). Dynamics of myosin, microtubules, and Kinesin-6 at  
875 the cortex during cytokinesis in *Drosophila* S2 cells. *J Cell Biol*, 186(5), 727-738.  
876 doi:10.1083/jcb.200902083
- 877 Wang, Y. L., Silverman, J. D., & Cao, L. G. (1994). Single particle tracking of surface receptor movement  
878 during cell division. *J Cell Biol*, 127(4), 963-971.
- 879 White, J. G., & Borisy, G. G. (1983). On the mechanisms of cytokinesis in animal cells. *J Theor Biol*,  
880 101(2), 289-316.
- 881 Wolpert, L. (1960). The mechanics and mechanism of cleavage. *International review of cytology*, 10,  
882 163-216.
- 883 Wu, J. Q., & Pollard, T. D. (2005). Counting cytokinesis proteins globally and locally in fission yeast.  
884 *Science*, 310(5746), 310-314. doi:10.1126/science.1113230
- 885 Xiong, H., Mohler, W. A., & Soto, M. C. (2011). The branched actin nucleator Arp2/3 promotes nuclear  
886 migrations and cell polarity in the *C. elegans* zygote. *Dev Biol*, 357(2), 356-369.  
887 doi:10.1016/j.ydbio.2011.07.008

- 888 Yumura, S. (2001). Myosin II dynamics and cortical flow during contractile ring formation in Dictyostelium  
889 cells. *J Cell Biol*, 154(1), 137-146.
- 890 Zhou, M., & Wang, Y. L. (2008). Distinct pathways for the early recruitment of myosin II and actin to the  
891 cytokinetic furrow. *Mol Biol Cell*, 19(1), 318-326. doi:10.1091/mbc.E07-08-0783
- 892 Zhu, Z., Chai, Y., Jiang, Y., Li, W., Hu, H., Li, W., . . . Ou, G. (2016). Functional Coordination of WAVE  
893 and WASP in *C. elegans* Neuroblast Migration. *Dev Cell*, 39(2), 224-238.  
894 doi:10.1016/j.devcel.2016.09.029
- 895 Zinemanas, D., & Nir, A. (1987). Fluid mechanical simulations of cell furrowing due to anisotropic surface  
896 forces. In N. Akkas (Ed.), *Biomechanics of cell division* (pp. 281-305): Plenum Press, New York.
- 897 Zinemanas, D., & Nir, A. (1988). On the viscous deformation of biological cells under anisotropic surface  
898 tension. *J Fluid Mech*, 193, 217-241.
- 899 Zumdieck, A., Kruse, K., Bringmann, H., Hyman, A. A., & Julicher, F. (2007). Stress generation and  
900 filament turnover during actin ring constriction. *PLoS One*, 2(8), e696.  
901 doi:10.1371/journal.pone.0000696

902



903 FIGURES AND FIGURE LEGENDS

Figure 1

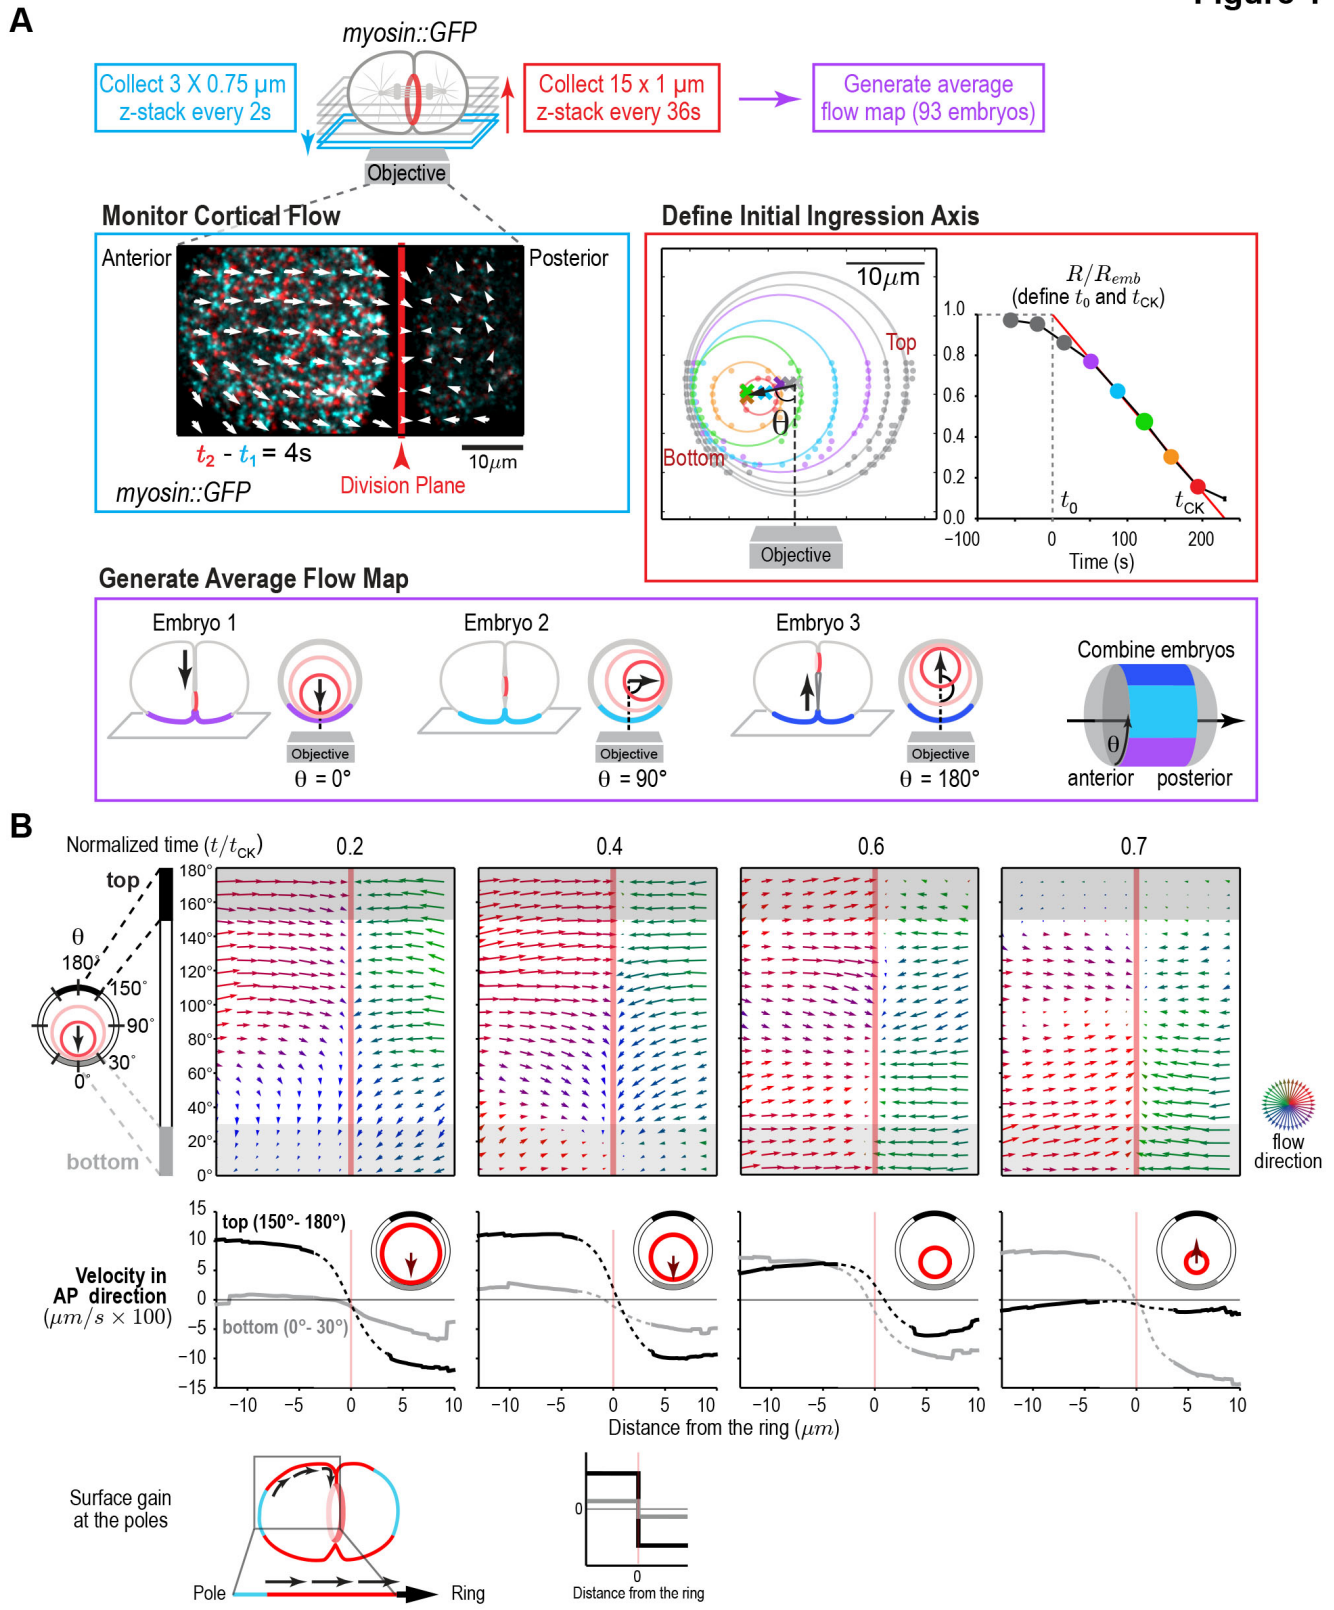

904

905

906 **Figure 1. An average cortical flow map reveals that surface gain occurs at the cell poles. (A) (top)**  
907 Schematic of the experimental procedure. (*middle, left*) Superposition of images of the cortex acquired  
908 4s apart. Arrows indicate cortical flow (magnified 2.5X). (*middle, right*) The initial ingression axis,  $t_0$ , and  
909  $t_{CK}$  were defined as shown for a representative embryo. The angle  $\theta$  specifies the position of the imaged  
910 cortex relative to the initial ingression axis. Image and quantification are representative of the 93 imaged  
911 embryos. (*bottom*) Angular position was used to combine data from 93 embryos to generate an average  
912 flow map. **(B) (top)** Average flow at the indicated timepoints. Arrows show direction and magnitude of the  
913 displacement in 2s (magnified 20X). (*middle*) Graphs are average velocity in the A-P direction versus  
914 position along the A-P axis for the cortex on the top (*black*) and bottom (*grey*) of the embryo (*shaded in*  
915 *flow maps*). Surface movement changes direction across the division plane, the apparent velocity  
916 gradient close to the division plane is a projection artifact due to surface curvature (dotted regions on  
917 velocity curves). (*bottom*) Schematics show a one-dimensional representation and expected cortical  
918 velocity plot for surface gain at the poles.  
919

## Figure 1—figure supplement 1

Single copy RNAi-resistant transgene insertion encoding NMY-2::GFP

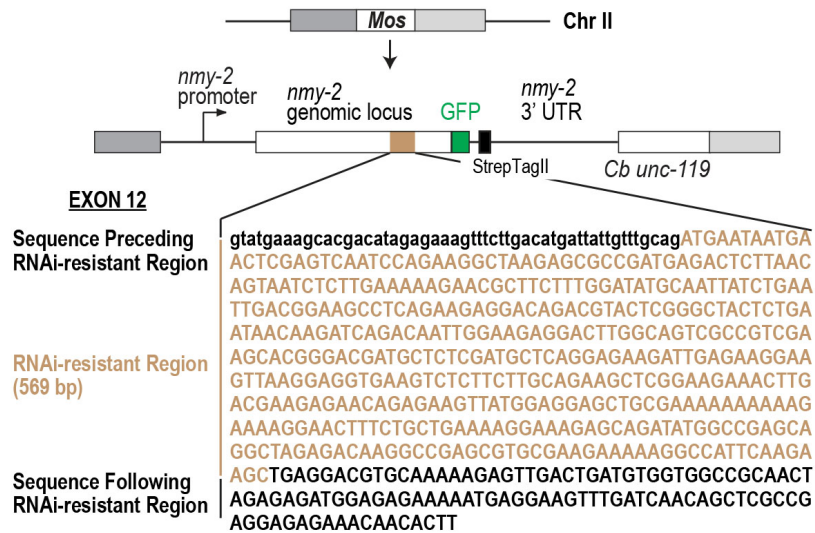

920

921 **Figure 1 – Figure Supplement 1. Schematic of the single-copy *nmy-2::gfp* transgene inserted into**  
 922 **a specific locus on chromosome II. *Cb unc-119*, the *unc-119* coding region from the related nematode**  
 923 ***C. briggsae*, was used as a transformation marker. The transgene was re-encoded while maintaining**  
 924 **amino acid sequence in the indicated region to render it resistant to RNAi targeting the endogenous**  
 925 **gene for other experiments, we did not use this feature in the experiments reported here.**

## Figure 1—figure supplement 2

Probability that initial ingresson axis angle falls in indicated range

more compressed (2.0% agarose pad), n=64  
 less compressed (0.5% double thick agarose pad), n=93

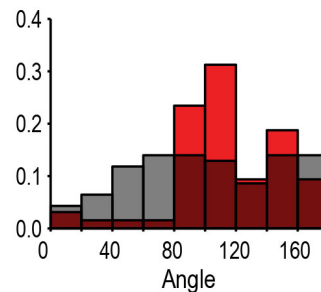

926

927 **Figure 1 – Figure Supplement 2. Compression biases the direction of contractile ring closure.**  
 928 **Graph plotting the probability that the angle between the objective axis and the initial ingresson axis falls**  
 929 **in the indicated range for embryos mounted with more (*red*) or less (*grey*) compression.**

930

931

Figure 1—figure supplement 3

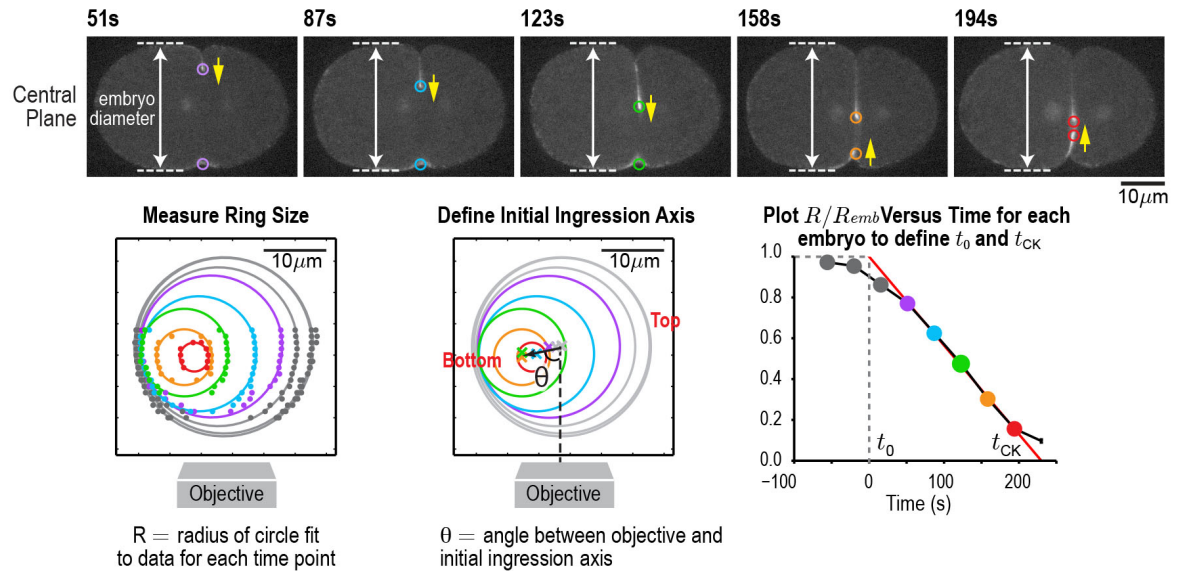

932

933 **Figure 1 – Figure Supplement 3. An automated method for monitoring contractile ring closure.**  
 934 (top) Central plane images of the embryo in Figure 1A. Panels on the lower left and lower right are  
 935 reproduced from Figure 1A for comparison. An automated algorithm was used to identify the edges of  
 936 the embryo (dashed lines) and the position of the contractile ring (colored circles) in each z-plane. Yellow  
 937 arrows mark the direction of furrow ingression and illustrate how the furrow initially ingresses from the top  
 938 and then changes directions to ingress from the bottom during the second half of cytokinesis. (lower left)  
 939 Points marking contractile ring position in the z-planes were projected onto an end-on view of the division  
 940 plane. Data for different timepoints in this representative embryo are shown in colors corresponding to  
 941 the circles in the central plane images. Ring sizes were measured by fitting circles to the data. (middle)  
 942 The initial axis of contractile ring closure was defined by the angle  $\theta$  between the objective axis and a  
 943 line fit through the centers of the contractile rings with a normalized size  $> 0.3$ . (right) = A plot of  
 944 normalized ring size versus time for this embryo defines  $t_0$  and  $t_{CK}$  as the times when a line fit through the  
 945 points corresponding to ring sizes between 0.3 and 0.8 crossed 1 and 0, respectively. Scale bar is  $10\mu\text{m}$ .  
 946

947

Figure 1—figure supplement 4

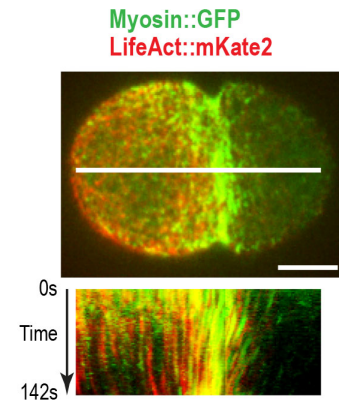

948

949 **Figure 1 – Figure Supplement 4.** Actin and myosin move together with the cortical surface during  
 950 cytokinesis. The white line in the center of the image (*top*) indicates the region used for the kymograph  
 951 (*bottom*). Image is representative of 5 imaged embryos. Scale bar is 10 $\mu$ m.

Figure 1—figure supplement 5

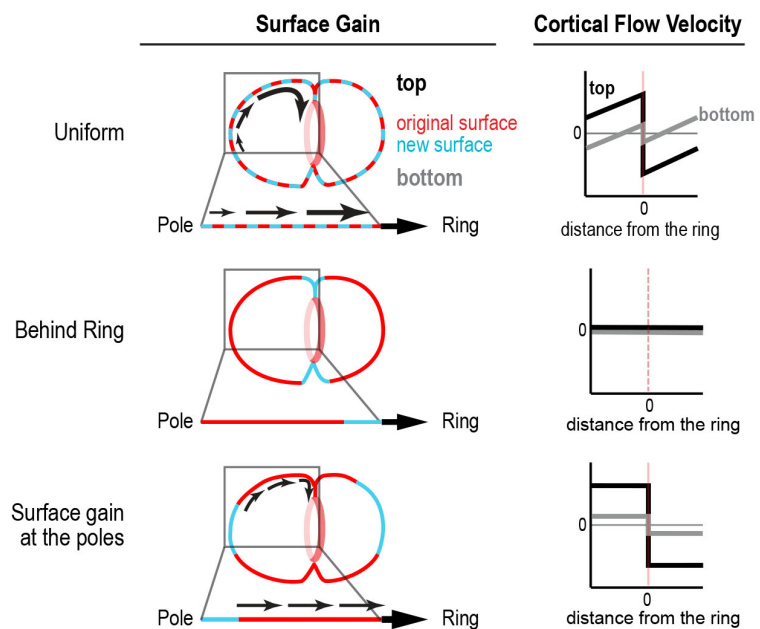

952

953 **Figure 1 – Figure Supplement 5.** Different profiles of cortical surface velocity along the A-P axis are  
 954 predicted for different spatial patterns of surface gain. (*top*) For surface gain behind the ring, no cortical  
 955 movement is predicted on the embryo surface. (*middle*) For uniform surface gain, a gradient of velocities  
 956 will be observed, where the cortex immediately behind the ring moves at the speed of the ingressing  
 957 furrow, and cortical velocity decreases linearly towards the cell poles. (*bottom*) Reproduced from Figure  
 958 1B for comparison. If surface is gained only at the poles, cortical velocity will be constant in magnitude  
 959 within the flow map region with opposite direction on the two sides of the embryo.



960

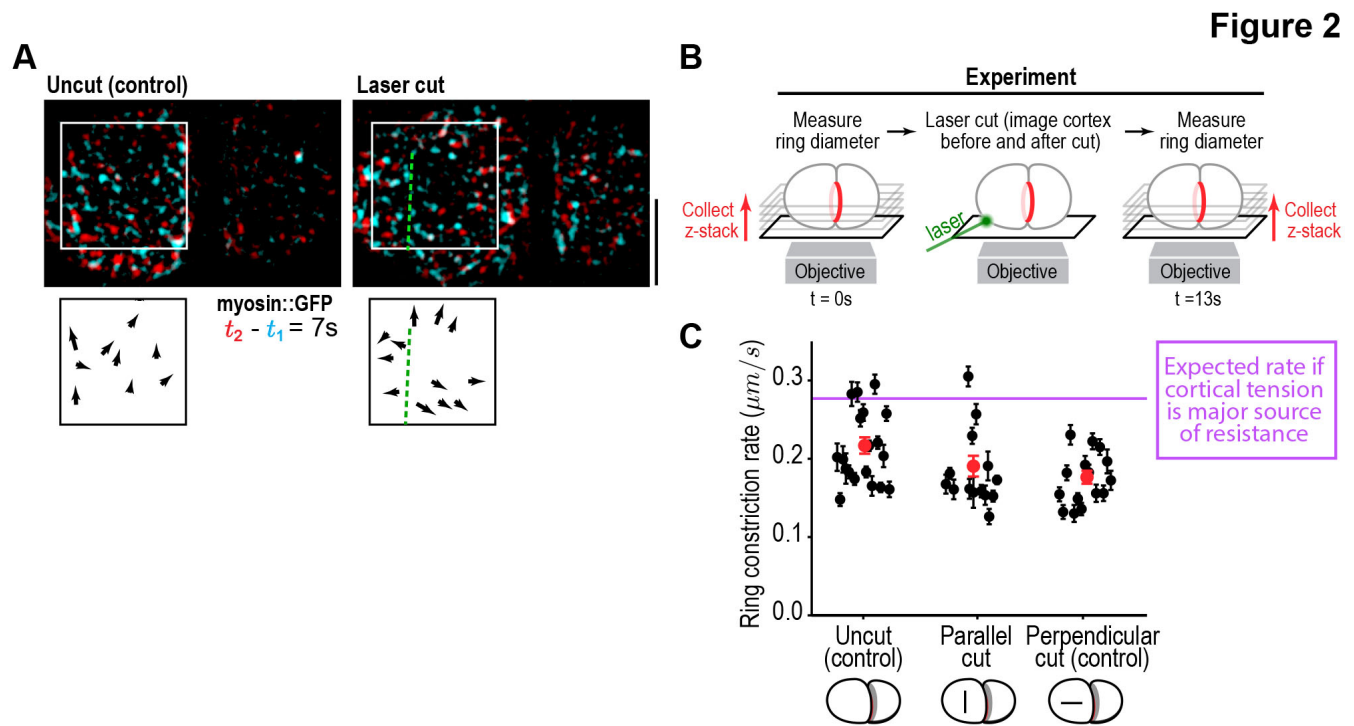

961

962

963 **Figure 2. Cortical tension does not limit the rate of ring closure.** (A) The success of cortical cuts was  
 964 assessed by comparing surface images of cortical myosin before (*cyan*) and after (*red*) the cut to monitor  
 965 the movement of myosin foci away from the cut site. Representative images from 1 out of 48 embryos  
 966 imaged are shown. Scale bar is 10  $\mu\text{m}$ . (B) Schematic of laser ablation experiment to determine if  
 967 cortical resistance limits the rate of contractile ring closure. Contractile ring sizes were measured from  
 968 z-stacks acquired before and after a cut was made across the cortex with a laser. (C) Graph plots the rates  
 969 of ring closure derived from before and after ring size measurements for uncut controls (n=19 embryos)  
 970 and embryos with cuts perpendicular (n=15 embryos) or parallel (n=14 embryos) to the ring. Black  
 971 symbols are single embryo measurements with measurement errors. Red symbols are the means; error  
 972 bars are the SEM. The purple line marks expected closure rate if cortical tension is a major source of  
 973 resistance.

974

## Figure 2—figure supplement 1

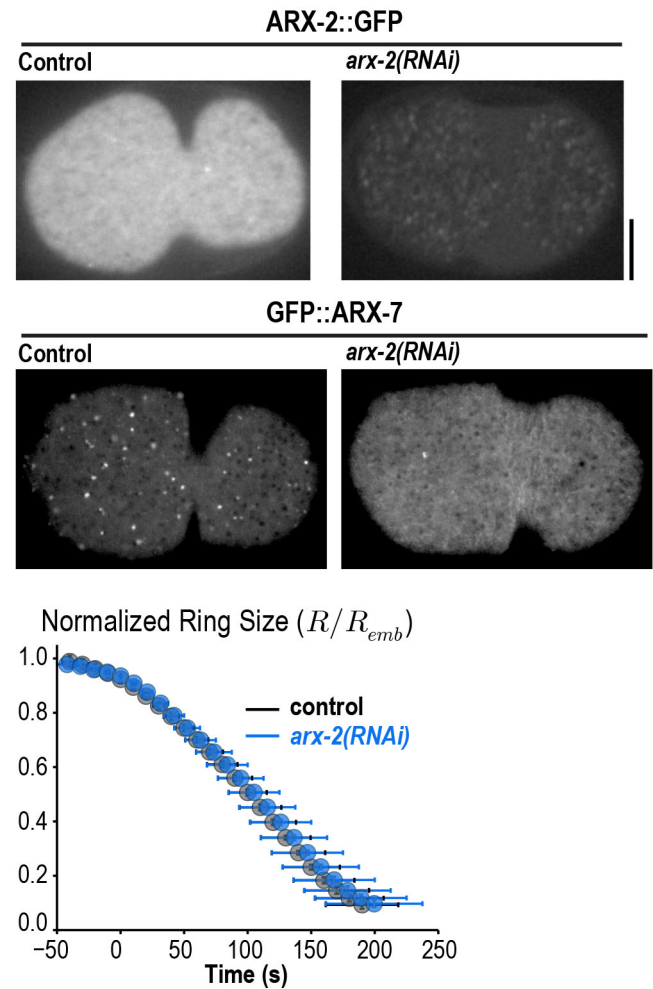

975

976 **Figure 2 – Figure Supplement 1. Arp2/3 depletion does not alter ring constriction kinetics.** Images  
977 of cortical ARX-2::GFP and GFP::ARX-7 in control and *arx-2(RNAi)* embryos confirm loss of cortical  
978 Arp2/3 complex (images are representative of 10 imaged embryos for each condition in the GFP::ARX-7  
979 strain and 15 for control and 13 for *arx-2(RNAi)* in the ARX-2::GFP strain). Scale bars are 10 $\mu$ m. Graph  
980 plots average contractile ring size versus time for control (grey) and *arx-2(RNAi)* (blue) embryos  
981 expressing myosin::GFP (n= 93 embryos for control and 68 embryos for *arx-2(RNAi)*). Error bars are  
982 standard deviation.

983



## Figure 2—figure supplement 2

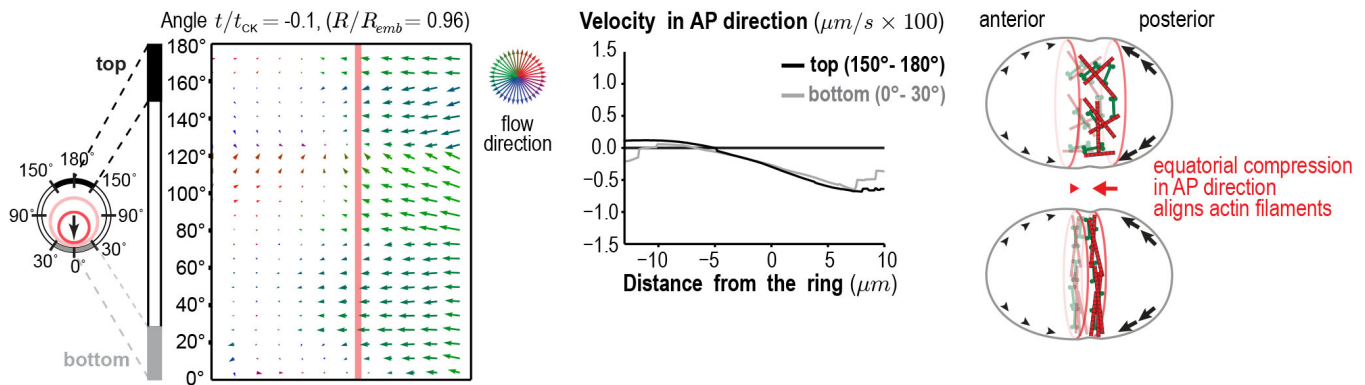

984

985 **Figure 2 – Figure Supplement 2. An equatorial zone of cortical compression is observed during**  
986 **contractile ring assembly.** (left) Average flow map at ( $t/t_{CK} = -0.1$ ) immediately after spindle-based  
987 signaling has recruited myosin and other contractile ring components to the equatorial cortex ( $n = 93$   
988 embryos). (middle) The surface velocity profile reveals a velocity gradient that spans the cell equator (-5  
989 to +5  $\mu\text{m}$ ), indicating a zone of cortical compression. (right) Schematic depicting how polar expansion in  
990 response to tension generated by the forming ring contributes to equatorial filament alignment during ring  
991 assembly.

992

Figure 3

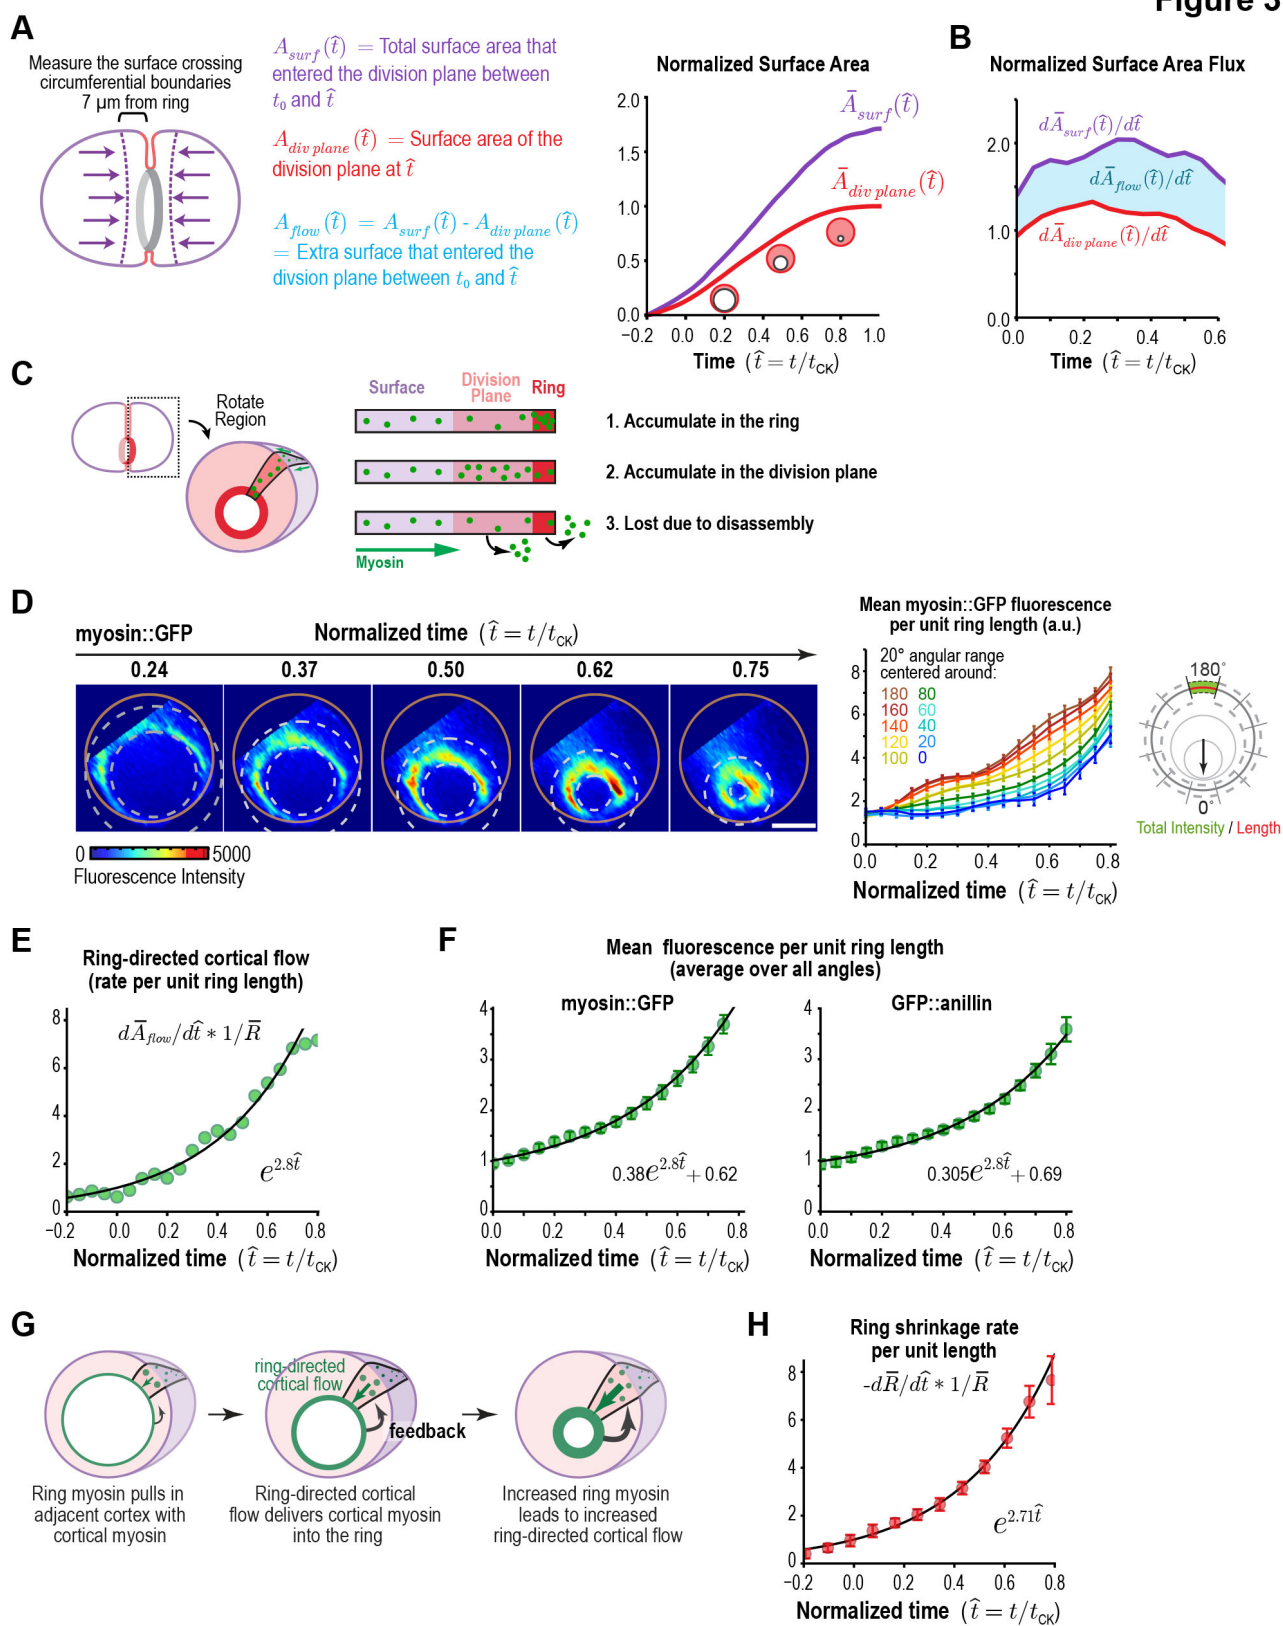

993

994

995 **Figure 3. Cortical surface is compressed into the contractile ring during constriction leading to**  
996 **an exponential increase in the amount of ring components and in the rates of cortical flow and**  
997 **ring constriction. (A)** Plot comparing the area of the forming division plane (*red*) with the total cortical  
998 surface area that entered the division plane from the start of cytokinesis (*purple*; calculated as indicated  
999 in the schematic). **(B)** Plot comparing the rate of cortical flow into the division plane (*purple*) with the rate  
000 of division plane growth (*red*). **(C)** Possible fates for extra cortical surface delivered to the division plane.  
001 **(D)** (*left*) Images of the division plane reconstructed from 40-plane z-stacks. Gold circles mark the  
002 embryo boundary and dashed circles mark the boundaries used for ring intensity measurements. (*right*)  
003 Graph plots per unit length myosin::GFP fluorescence for the indicated angular ranges (n=36 embryos).  
004 Image series is representative of 36 imaged embryos. **(E,F)** Graphs plot per unit length rate of ring-  
005 directed cortical flow (n=93 embryos) and mean per unit length myosin::GFP (n=36 embryos) or  
006 GFP::anillin (n=26 embryos) fluorescence (n=36 embryos) in the ring. **(G)** Schematic illustrating the  
007 proposed feedback loop that drives the parallel exponential increases in ring myosin and in the rates of  
008 cortical flow and constriction. **(H)** Graph plots the per unit length rate of ring closure. Black lines are fitted  
009 single exponentials. Error bars are the SEM.  
010

### Figure 3—figure supplement 1

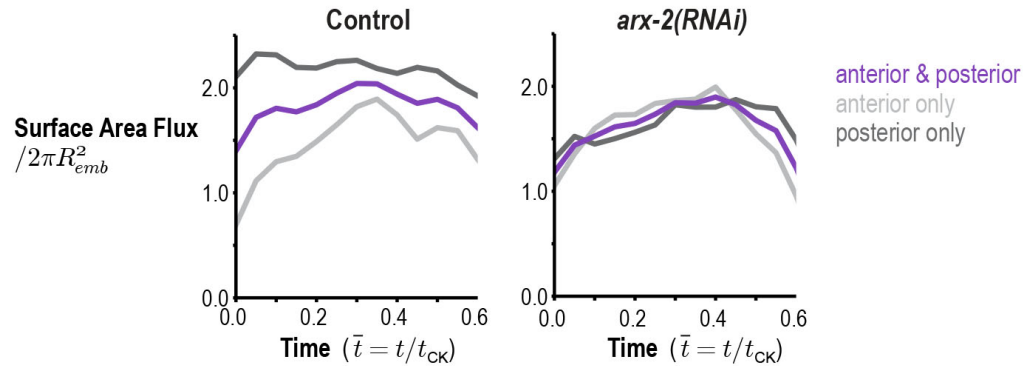

011

012 **Figure 3 – Figure Supplement 1. Arp2/3 inhibition abolishes the asymmetry in the amount of**  
 013 **cortex entering the division plane from the anterior and posterior sides.** Graphs plot the rate of  
 014 cortical flux across the anterior (*light grey*) and posterior (*dark grey*) boundaries (see schematic in Figure  
 015 3A) versus the mean for the two sides (*purple*) for control and *arx-2(RNAi)* embryos. Calculated from the  
 016 average flow maps for the control (n= 93 embryos) and *arx-2(RNAi)* (n= 68 embryos) conditions.

### Figure 3—figure supplement 2

Single copy RNAi-resistant transgene  
 insertion encoding GFP::ANI-1

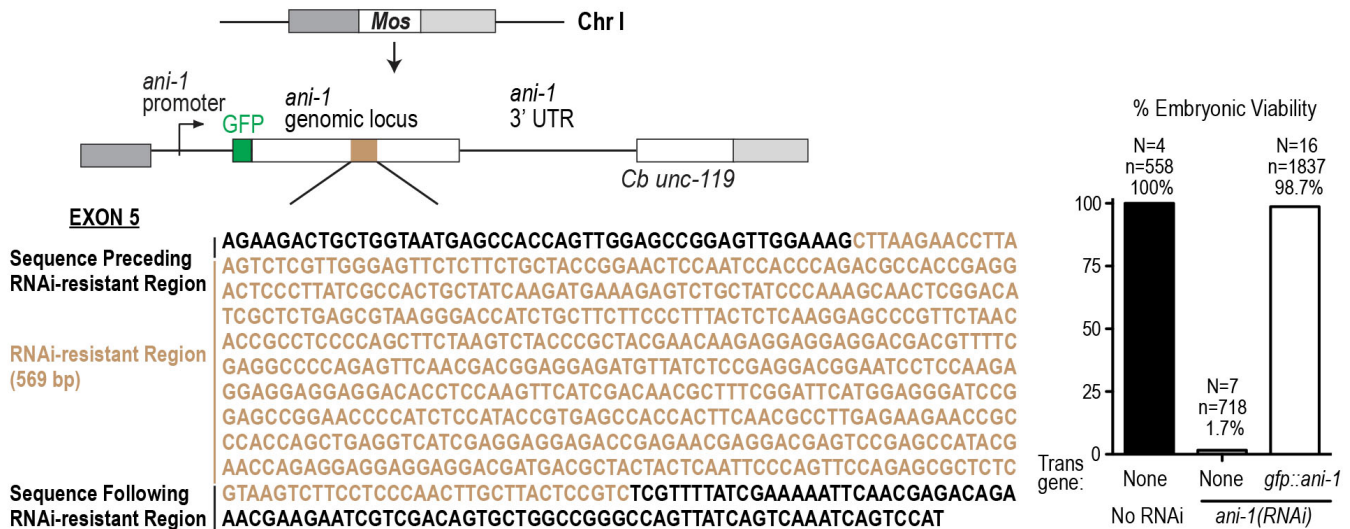

017

018 **Figure 3 – Figure Supplement 2. The GFP::anillin fusion is functional.** (*left*) Schematic of the single-  
 019 copy *gfp::ani-1* transgene. The transgene was re-encoded while maintaining amino acid sequence in the  
 020 indicated region to render it resistant to RNAi targeting of the endogenous *ani-1* gene to allow testing of  
 021 the functionality of the GFP::ANI-1 fusion. (*right*) Graph plotting embryonic lethality demonstrates  
 022 functionality of the *gfp::ani-1* transgene.

023

### Figure 3—figure supplement 3

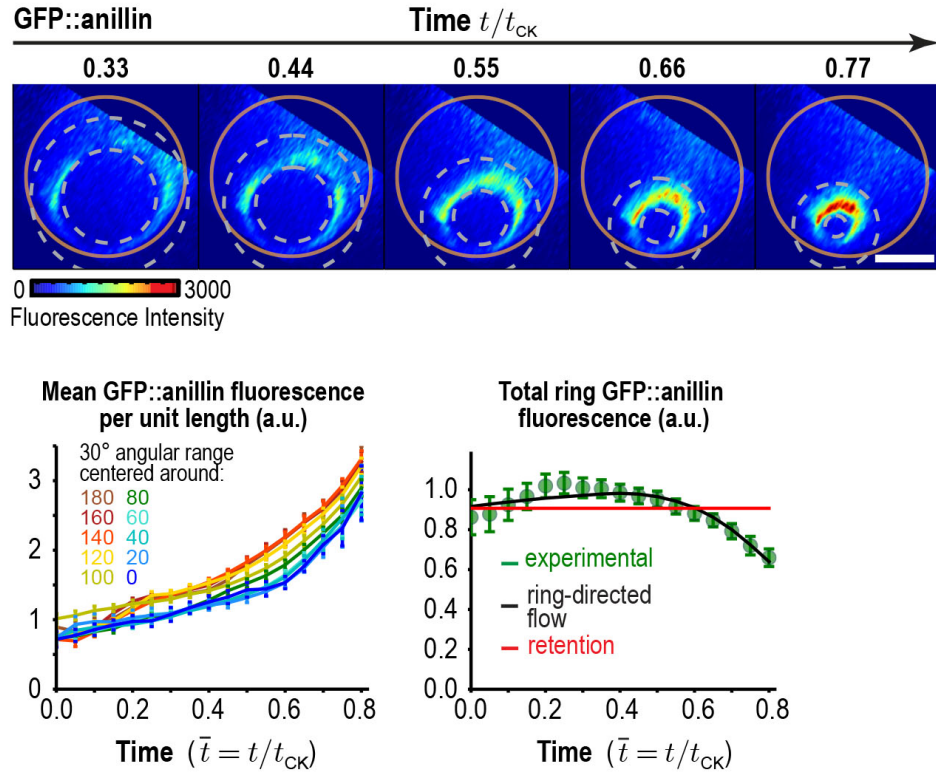

024

025 **Figure 3 – Figure Supplement 3. GFP::anillin fluorescence in the ring increases exponentially**  
 026 **during constriction.** (*top*) Images of the division plane in an embryo expressing GFP::anillin. (*bottom,*  
 027 *left*) Graph plots GFP::anillin fluorescence per unit length of the ring for the indicated angular ranges.  
 028 (*bottom, right*) Graph plotting mean total ring fluorescence (average for all angles; *green*) for GFP::anillin  
 029 ( $n=26$  embryos). The predictions for ring-directed cortical flow (*black*) and the retention (*red*) model are  
 030 also shown. Error bars are the SEM.

031



### Figure 3—figure supplement 4

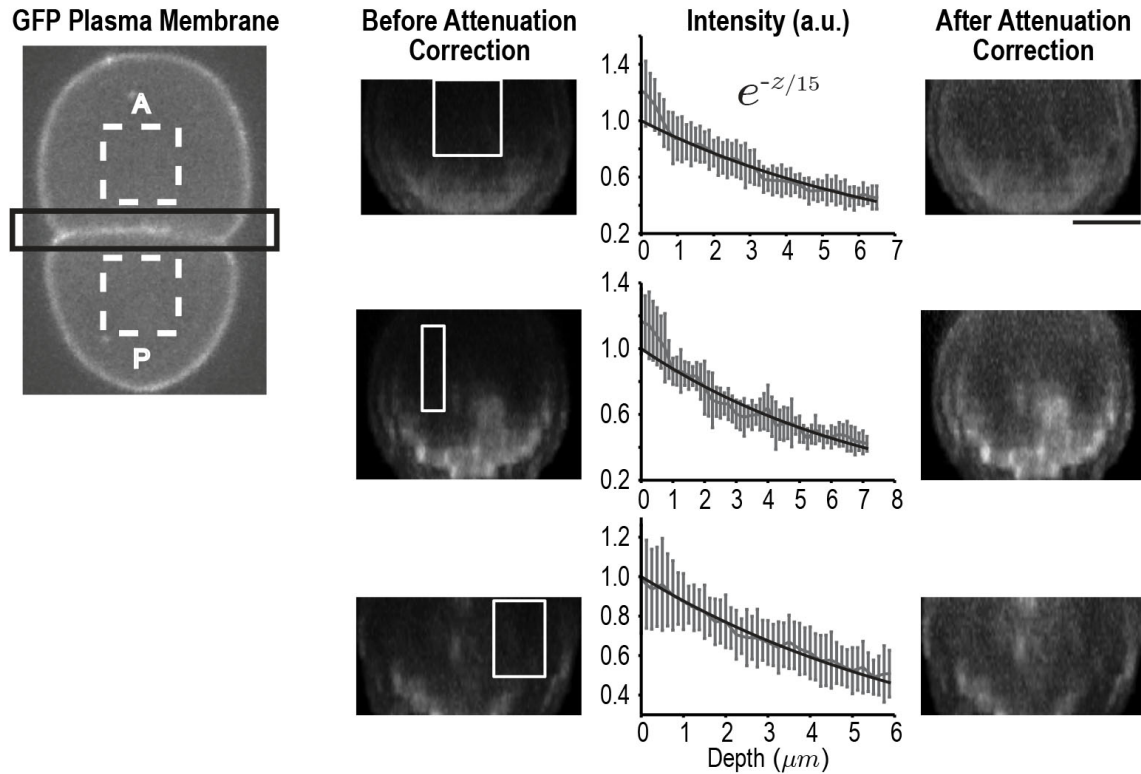

032

033 **Figure 3 – Figure Supplement 4. Correcting for signal attenuation with sample depth.**

034 Fluorescence attenuation with embryo depth was estimated from fluorescence intensity measurements  
035 made at the cell-cell boundary of the 2-cell embryos expressing a GFP-tagged plasma membrane  
036 marker. Cell-cell boundaries were reconstructed from 40 plane z-stacks. The intensity profile at each  
037 slice was calculated by subtracting the average background intensity estimated from dashed rectangles  
038 (left) from the cell-cell boundary region (black rectangle) at each slice and calculating the maximum  
039 intensity projection along AP axis. The effect of depth on signal was calculated from the reconstructed  
040 division planes by plotting the mean signal as a function of depth in 10 rectangular regions (white boxes)  
041 where the signal was expected to be uniform; three examples are shown here. All intensity profiles were  
042 simultaneously fitted using a single exponential. Error bars are the SD. On the right, the same cell-cell  
043 boundaries are shown after correction for depth attenuation. The scale bar is 10  $\mu\text{m}$ .

044

Figure 4

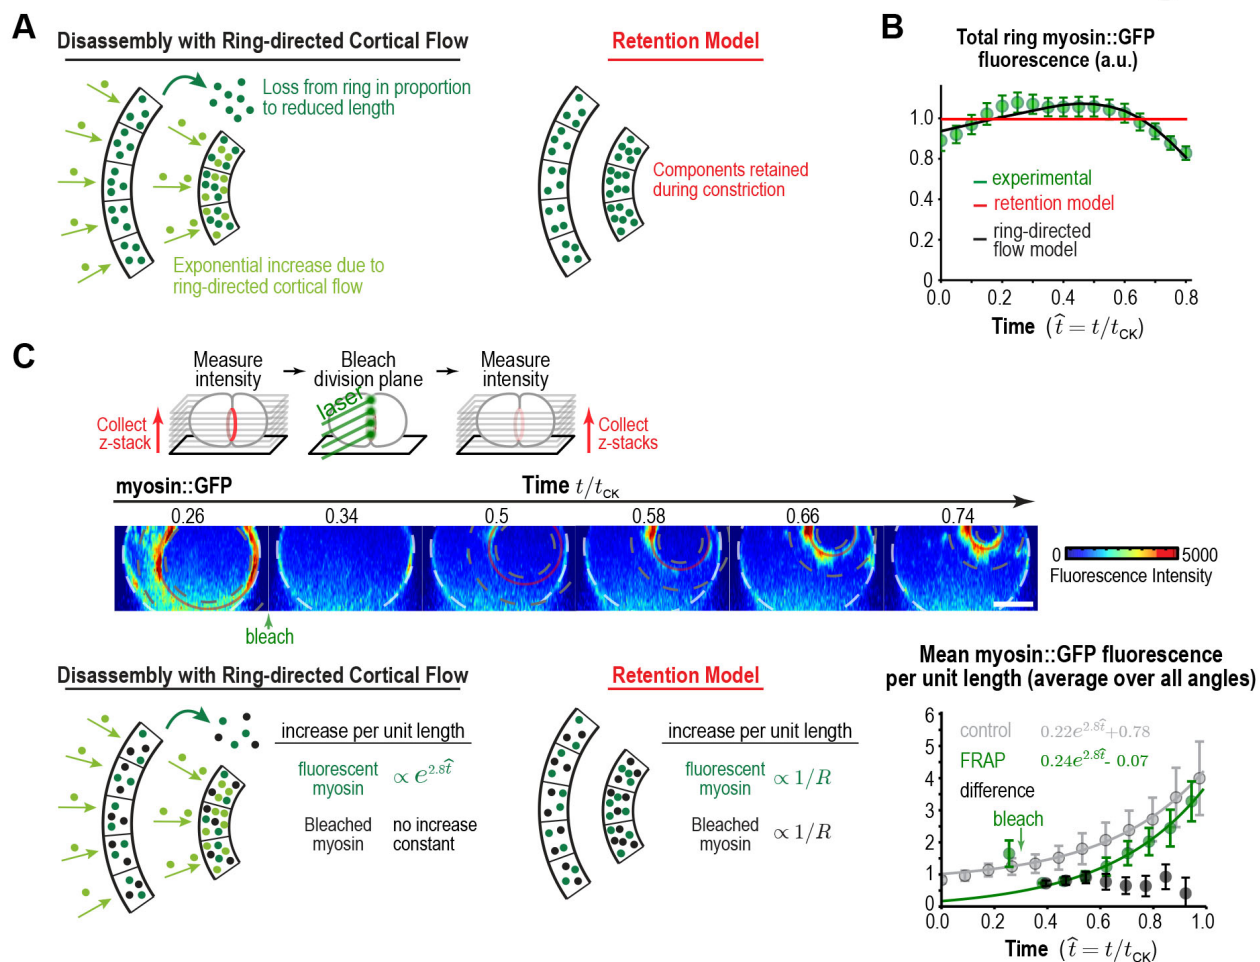

045 **Figure 4. Recovery of myosin::GFP fluorescence after division plane bleaching supports delivery**  
 046 **of myosin into the ring by ring-directed cortical flow.** (A) (left) Two models that could explain the  
 047 increase in the per unit length amount of myosin during constriction. (B) Graph plotting mean total ring  
 048 fluorescence (average over all angles; green) for myosin::GFP with the predictions for the ring-directed  
 049 cortical flow (black) and the retention (red) models (n= 36 embryos). Error bars are the SEM. (C) (top)  
 050 Schematic of the photobleaching experiment to discriminate between the two models. (middle) Images of  
 051 the division plane reconstructed from 30x1 $\mu$ m z-stacks of an embryo expressing myosin::GFP whose  
 052 division plane was bleached at  $t/t_{ck} \sim 0.3$ . Red circle marks the contractile ring and dashed circles mark  
 053 the boundaries used for ring intensity measurements. (bottom left) Schematics illustrate the expected  
 054 concentration changes for fluorescent and bleached myosin::GFP. (bottom right) Graph plotting the  
 055 mean per unit length amounts of fluorescent myosin::GFP in the ring for controls (grey, n=24 embryos)  
 056 and after bleaching (green, n=8 embryos). The amount of bleached myosin::GFP in the ring (black),  
 057 calculated as the difference between the control and FRAP curves is also shown. Continuous lines are  
 058 exponential fits to the data. Error bars for controls and FRAP are SD and error bars for the difference are  
 059 SEM. Scale bar is 10  $\mu$ m. Image series in (C) is representative of 8 imaged embryos.

060



Figure 4—figure supplement 1

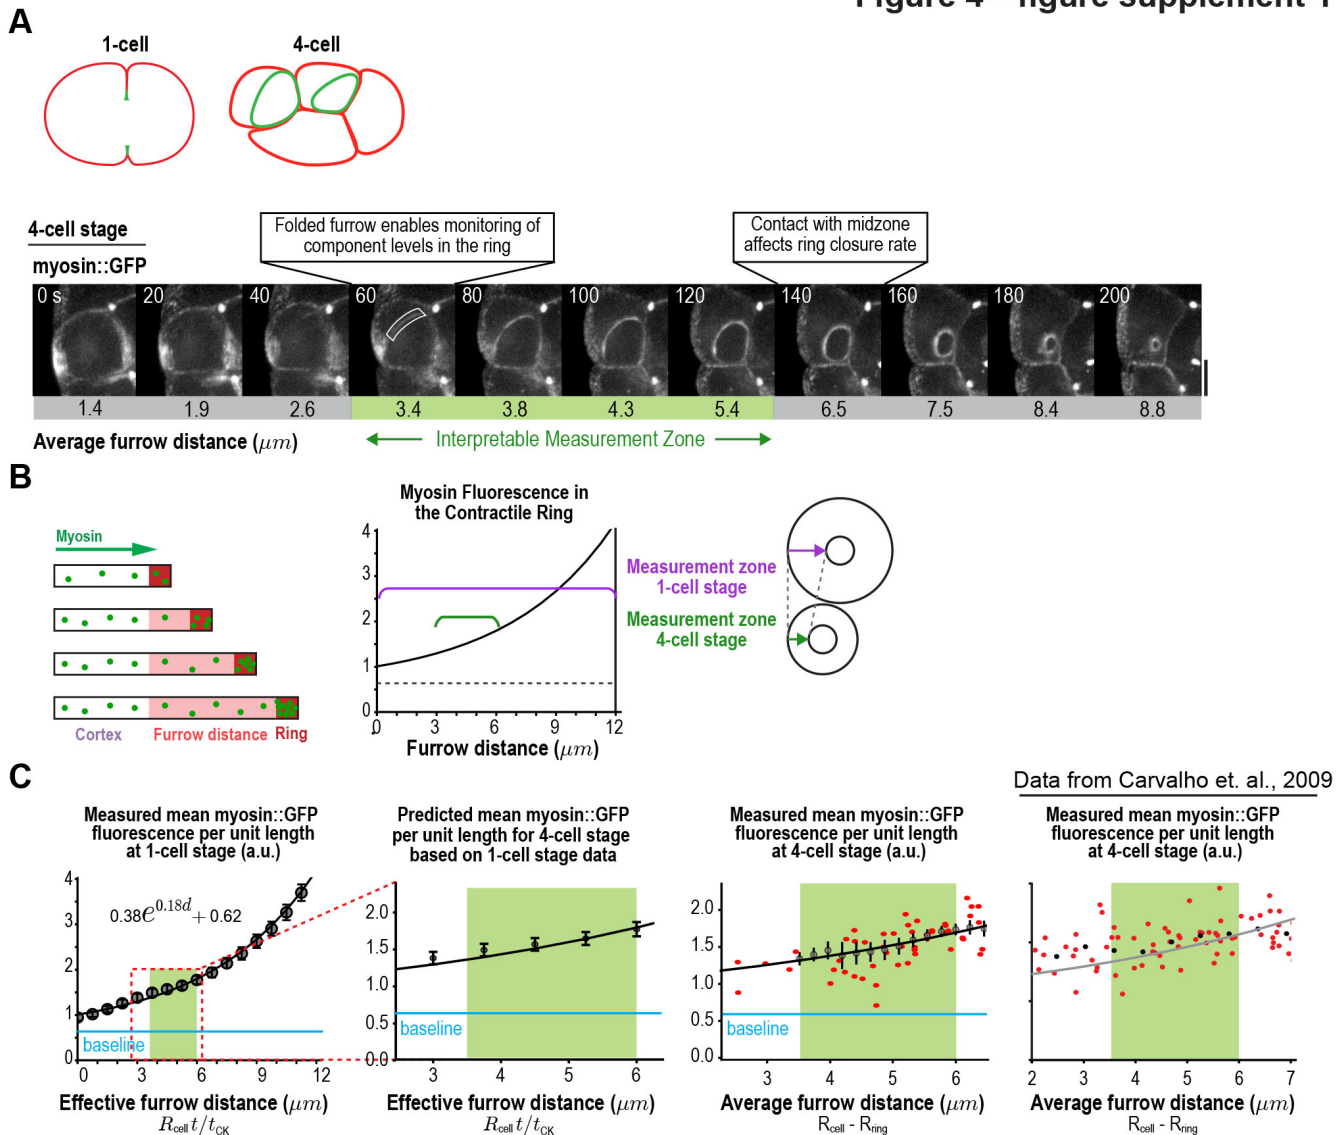

063 **Figure 4 – Figure Supplement 1. Ring component levels in 4-cell stage embryos are consistent**  
 064 **with accumulation due to ring-directed cortical flow. (A)** At the 4-cell stage, cells often divide  
 065 perpendicular to the imaging plane, providing an “end-on” view of the constricting ring relative to the  
 066 imaging plane. However, a disadvantage of this division is that ~2/3 of the ring runs along sides of the  
 067 cell in contact with neighboring cells and cannot be used for measurements. To be able to monitor  
 068 component dynamics in the entire ring over a larger range of ingression distances, we therefore  
 069 developed the quantitative tools described in this manuscript to monitor ring constriction at the 1-cell  
 070 stage. (*top*) Schematic illustrating the relative geometries of cytokinesis in 1- and 4-cell stage *C. elegans*  
 071 embryos. (*bottom*) images of the division plane in a representative dividing cell at the 4-cell stage  
 072 reconstructed from 16x1 $\mu$ m z-stacks of an embryo expressing myosin::GFP (n=16 embryos imaged). (B)  
 073 Our 1-cell stage analysis indicates that myosin levels in the ring increase exponentially as a function of furrow  
 074 distance. The schematics show myosin::GFP fluorescence in the ring as a function of furrow

075 ingression distance at the 1-cell stage, and the predicted change as the furrow ingresses through the  
076 interpretable measurement zone at the 4-cell stage if ring myosin accumulates via the same mechanism.  
077 Detecting an exponential increase at the 4-cell stage is significantly more difficult than at the 1-cell stage  
078 because the cells are smaller and the distance that the furrow ingresses between its formation and when  
079 it contacts the spindle midzone, which slows furrowing (Carvalho et al., 2009), is about one quarter of  
080 what it is at the 1-cell stage (*Measurement zones*). (C) In comparing the 1- and 4-cell stage data, we  
081 took advantage of the fact that the initial per unit length constriction rates are the same at the two stages  
082 (Carvalho et al., 2009). This makes it possible to predict the pattern of myosin accumulation that we  
083 would expect at the 4-cell stage if ring myosin accumulates via the same mechanism that it does at the  
084 1-cell stage, and compare it with measured values from the 4-cell stage. (*left panel*) One complication is  
085 that, while our 1-cell stage data show that myosin levels increase exponentially as a function of furrow  
086 distance, they also suggest there is a baseline of fluorescence (*cyan*) whose precise nature we do not  
087 understand—we postulate this baseline could correspond to myosin associated with the plasma  
088 membrane but not the cortex. This baseline signal is not part of the exponentially increasing population  
089 but influences the measured fold increase in total ring fluorescence. Curve fitting of the 1-cell stage data  
090 indicates that the exponentially increasing population increases ~9 fold as the furrow ingresses 12  $\mu\text{m}$ ;  
091 however, because of the baseline, the measured increase relative to initial ring fluorescence is only ~5-  
092 fold. (*middle and right panels*) At the 4-cell stage we can only measure ring component levels for furrow  
093 ingression distances between ~3 and 6  $\mu\text{m}$ . The 1-cell data predicts that the exponentially increasing  
094 population, which is approximately equal to the baseline at 3  $\mu\text{m}$ , would increase 1.7 fold by 6  $\mu\text{m}$ ,  
095 resulting in a 1.37-fold increase in total per unit length fluorescence. Fitting both new 4-cell data acquired  
096 with the *in situ* tagged myosin::GFP strain that we employed for the 1-cell analysis (*third panel*; n=14  
097 embryos) and re-plotting our old data acquired using a myosin::GFP transgene (obtained from (Carvalho  
098 et al., 2009); *right panel*) revealed excellent agreement with the predicted curve (*grey line*). Error bars  
099 are the SEM. We conclude that data from 4-cell stage embryos are consistent with an exponential  
100 increase in ring components during ingression due to ring-directed cortical flow, but technical challenges  
101 make clear evidence for an exponential increase significantly more challenging to obtain during this  
102 stage relative to 1-cell stage embryos.

103

## Figure 4—figure supplement 2

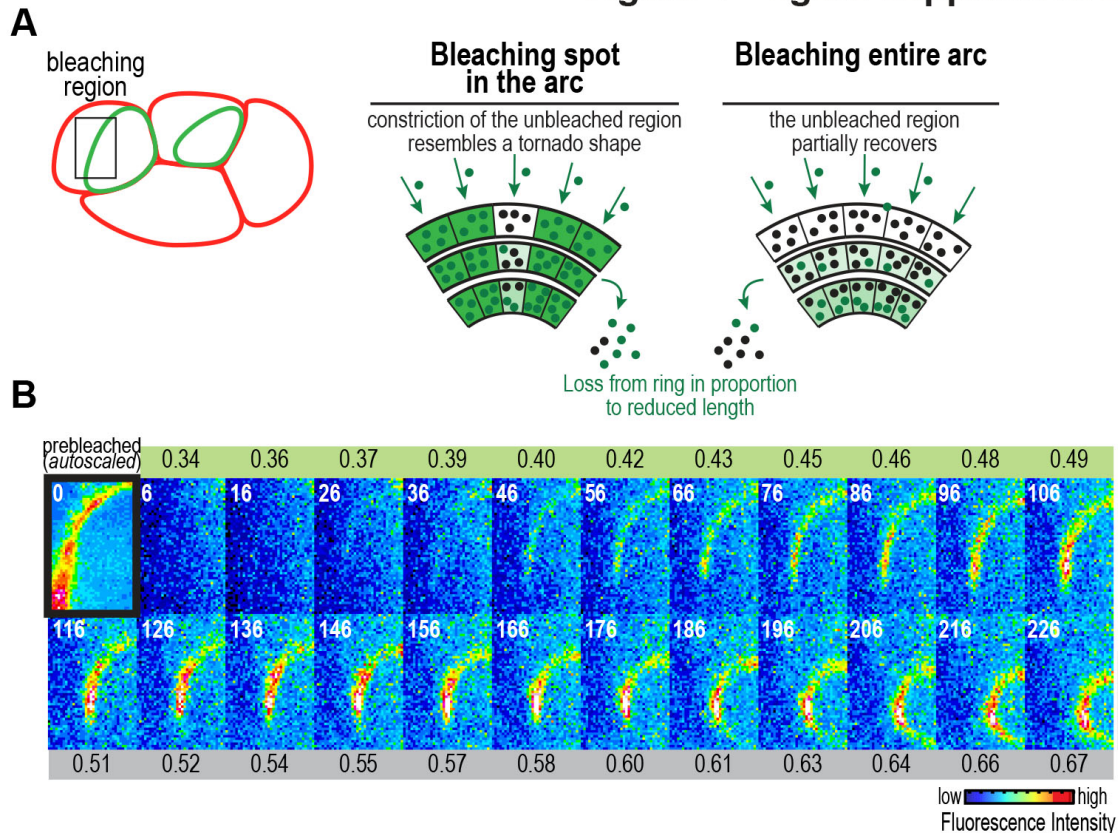

104

105 **Figure 4 – Figure Supplement 2. Recovery of myosin::GFP fluorescence after division plane**  
 106 **bleaching at the 4-cell stage supports delivery of myosin into the ring by ring-directed cortical**  
 107 **flow.** (A) We previously reported that following bleaching of a spot in the arc at the 4-cell stage, the  
 108 bleached region progressively shrinks, generating a tornado shape in kymographs of a region drawn  
 109 along the arc, and that the tornado thinning rate was slightly faster than predicted by shrinkage due to  
 110 ring disassembly alone, which we could not explain (Carvalho et al., 2009). The disassembly with ring-  
 111 directed cortical flow model that we propose here predicts that after photobleaching a spot in the arc, the  
 112 unbleached fluorescence in the flanking regions will dominate the fluorescence of the bleached region  
 113 and ring disassembly will cause the bleached region to progressively shrink, leading to a tornado shape  
 114 in the kymograph. At the same time, cortical myosin, which turns over faster than myosin in the ring, will  
 115 recover and ring-directed cortical flow will begin to deliver myosin to the ring again. The increase in ring  
 116 fluorescence due to cortical delivery would accelerate the rate of tornado thinning consistent with our  
 117 prior observations. (B) As a better test of whether ring-directed cortical flow delivers components to the  
 118 ring at the 4-cell stage, we monitored recovery after photobleaching the entire contractile arc similar to  
 119 the experiment that we performed at the 1-cell stage (Figure 4C). Images show a representative  
 120 bleached embryo (n=10). The observed recovery pattern was very similar to what we observed at the 1-  
 121 cell stage, supporting delivery by ring-directed cortical flow. Scale bar is 10  $\mu$ m.

Figure 5

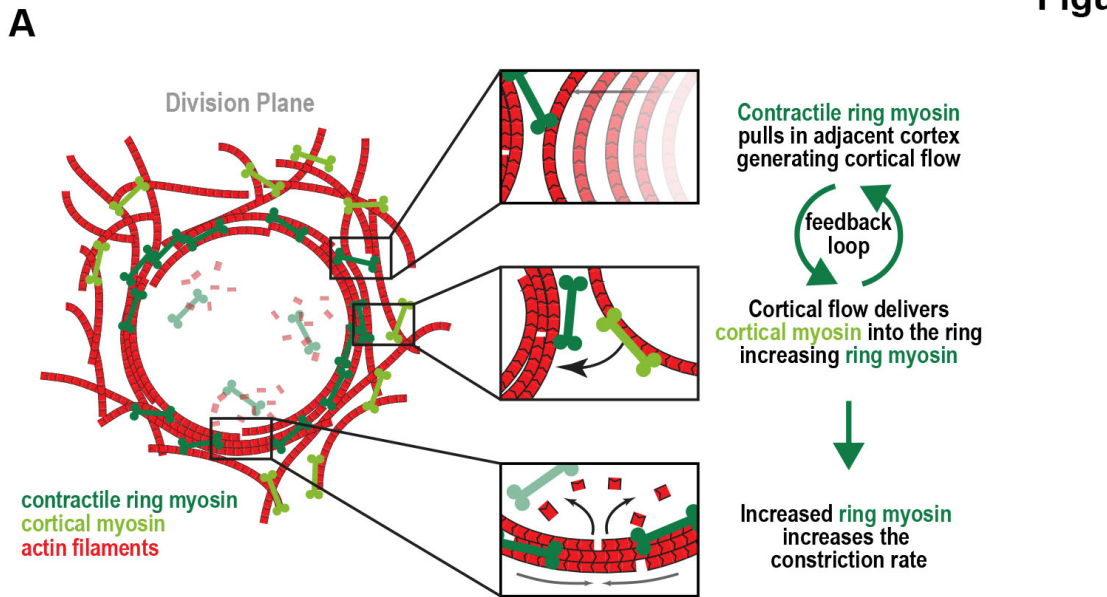

**B**

**Cortical Flow Feedback (CoFFee) model**

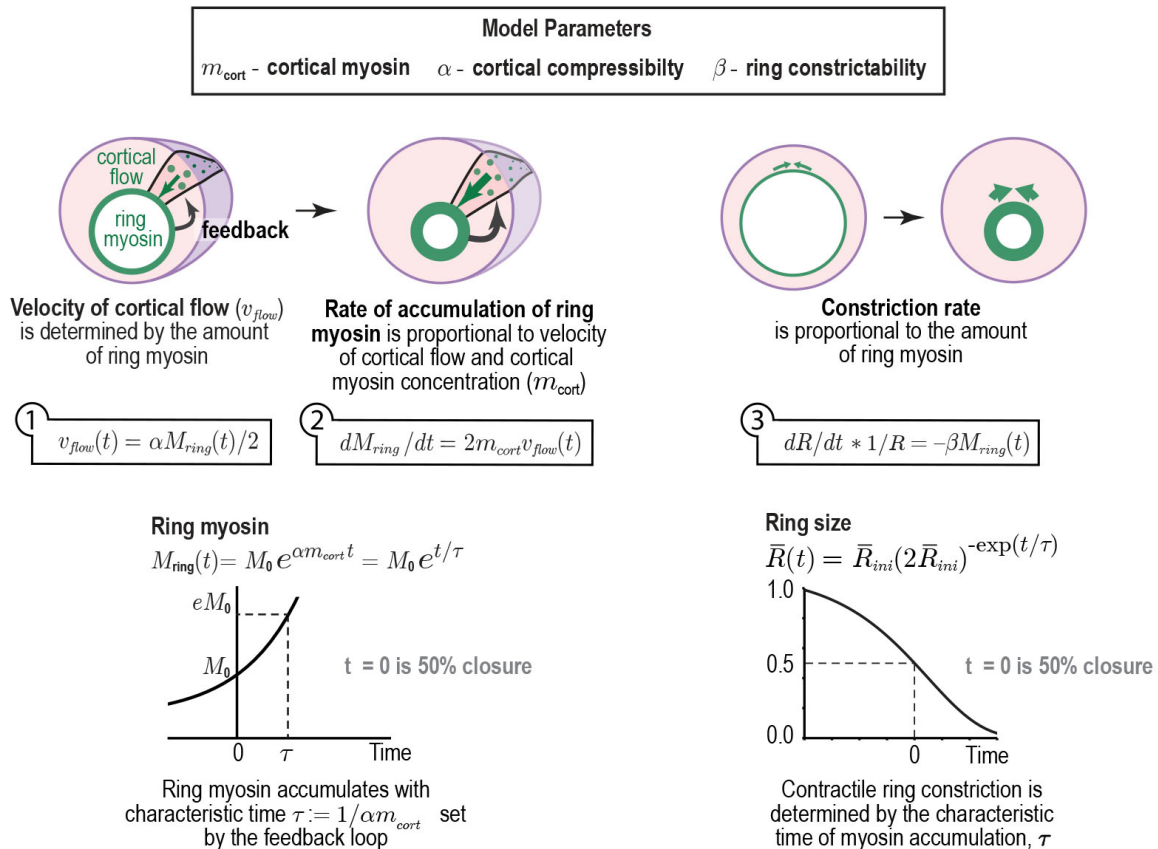

123 **Figure 5. Cortical Flow Feedback (CoFFee) model of cytokinesis.** (A) Schematic model incorporating  
124 the conclusions arising from our experimental analysis and proposed underlying molecular mechanism.  
125 (B) Formulation of the proposed mechanisms as an analytical mathematical model consisting of three  
126 equations and three model parameters that reflect properties of the cortex and ring. (*left*) Equations (1)  
127 and (2) describe the feedback loop between the amount of ring myosin and the velocity of cortical flow  
128 that leads to the exponential increases in the amount of ring myosin and the velocity of cortical flow.  
129 (*right*) Equation (3) describes the coupling of ring constriction to the amount of ring myosin.  
130



Figure 6

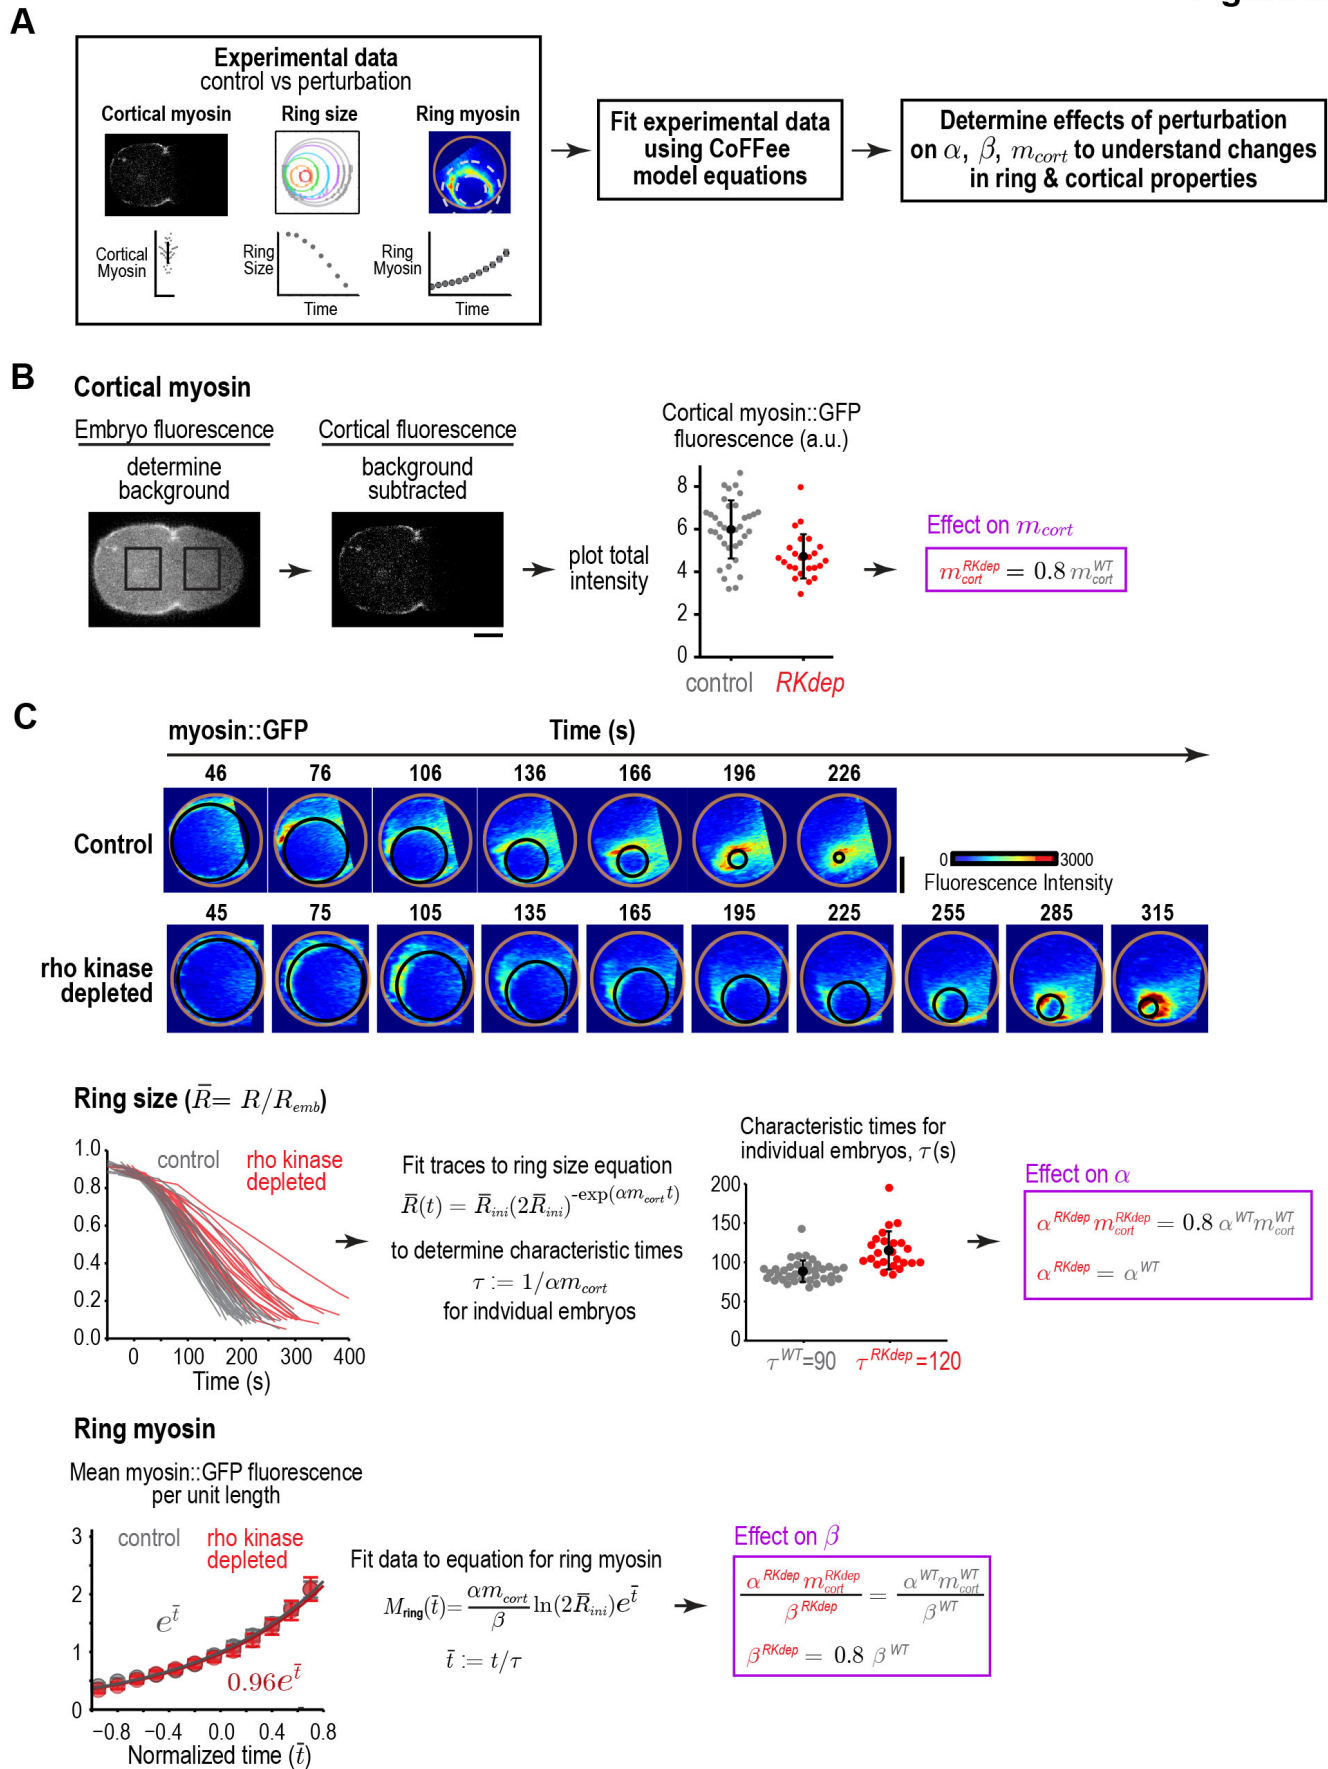

132 **Figure 6. Fitting experimental data using the CoFFee model equations reveals the effects of rho**  
133 **kinase inhibition on cortical and contractile ring properties. (A)** Flow chart illustrating how the  
134 CoFFee model can be used to fit experimental data to determine the effects of molecular perturbations  
135 on ring and cortical properties. **(B)** (*left*) images illustrating the method used to directly measure cortical  
136 myosin::GFP fluorescence. (*right*) Graph plotting cortical myosin::GFP fluorescence for control (*grey*,  
137 n=36) and rho kinase depleted (*red*, n=24) embryos. The mean and SD for each condition are shown in  
138 black. **(C)** (*top*) Images of the division plane in control and rho kinase depleted embryos expressing  
139 myosin::GFP. Gold circles mark the embryo boundaries and black circles mark the contractile ring.  
140 Image series shown are representative of the imaged embryos. Scale bar is 10  $\mu\text{m}$ . (*middle, left*) Graphs  
141 of ring size traces for individual control (*grey*, n=36) and rho kinase depleted (*red*; n=24) embryos.  
142 (*middle, center*). Characteristic times,  $\tau$ , for individual control (*grey*) and rho kinase depleted (*red*)  
143 embryos are plotted along with the mean and SD for each condition (*black*). (*bottom*) Graph plots mean  
144 myosin::GFP fluorescence per unit length (averaged over all angles with baseline subtraction) for control  
145 (*grey*) and rho kinase depleted (*red*) embryos. Error bars are SEM.

### Figure 6—figure supplement 1

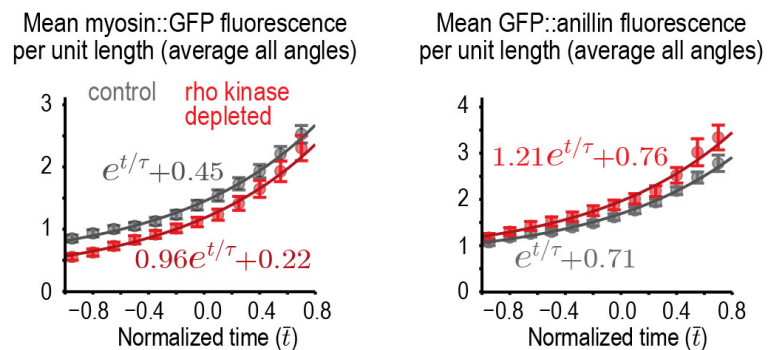

146

147 **Figure 6 – Figure Supplement 1. Plots of mean myosin::GFP and GFP::anillin fluorescence in the**  
148 **ring versus time.** Graphs plotting mean fluorescence per unit length (averaged over all angles) for  
149 GFP::anillin and myosin::GFP without baseline subtraction. Error bars are the SEM.

150



Figure 7

A

Effects of rho kinase depletion (from myosin::GFP data)

| mechanical property      | model parameter | value relative to wild type |
|--------------------------|-----------------|-----------------------------|
| cortical compressibility | $\alpha$        | WT                          |
| cortical myosin          | $m_{cort}$      | 0.8 WT                      |
| ring constrictability    | $\beta$         | 0.8 WT                      |

B

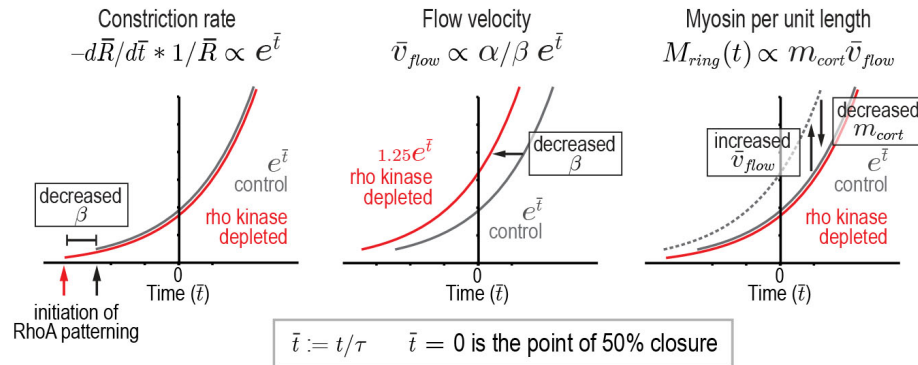

C

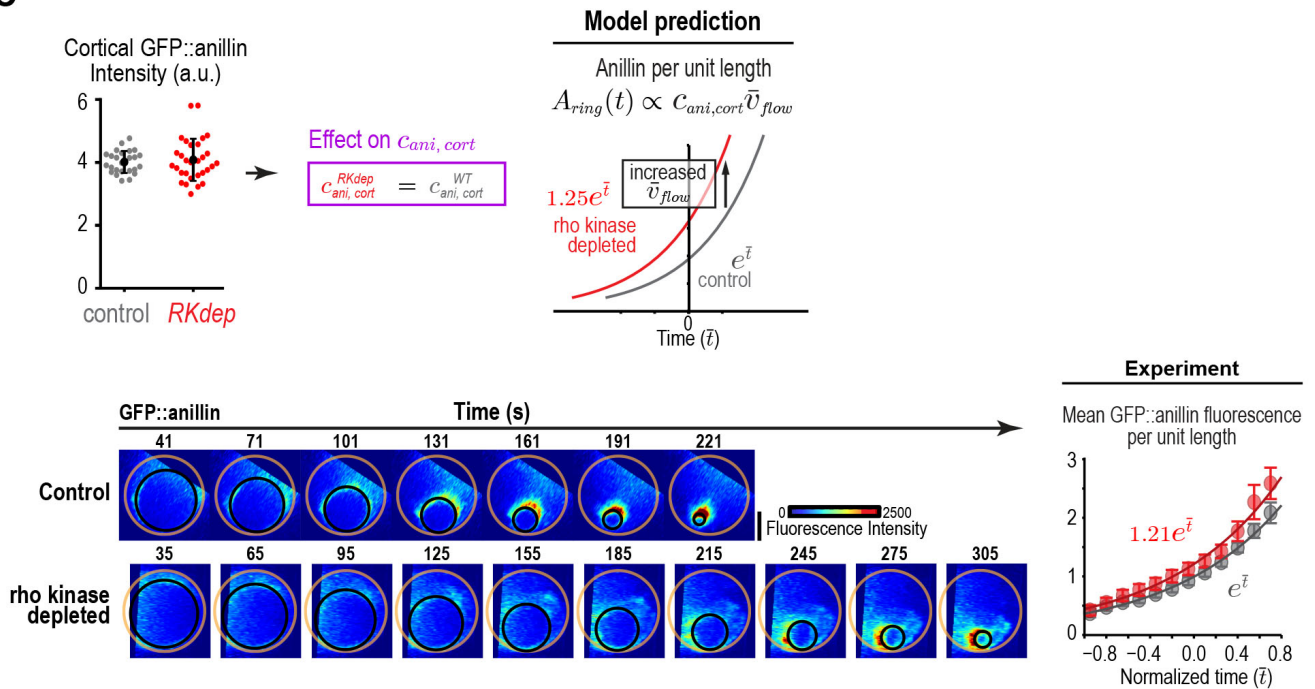

151

152

153 **Figure 7. Reducing myosin activation by inhibition of rho kinase reduces the ability of the ring to**  
 154 **be constricted by ring myosin. (A) (top)** Table summarizing the effects of rho kinase depletion on  
 155 model parameters. **(B)** Schematics summarizing the effects of rho kinase inhibition in the reference  
 156 frame where time is normalized by dividing by  $\tau$  and  $\bar{t} = 0$  is 50% closure. In this time reference,  
 157 comparing component levels and flow velocity at the same  $\bar{t}$  corresponds to comparing them for the  
 158 same ring size. **(C) (top, left)** Graph plotting cortical GFP::anillin fluorescence in control (n=25) and rho  
 159 kinase depleted (n=30) embryos. The mean and SD are shown in black. **(top, right)** Since the  
 160 concentration of cortical anillin is not changed, the increased cortical flow in rho kinase depleted embryos  
 161 is expected to lead to a 1.25-fold increase in the per unit length amount of anillin for rings of all sizes.  
 162 **(bottom, left)** Images of the division plane in representative control and rho kinase depleted embryos  
 163 expressing GFP::anillin. Gold circles mark the embryo boundaries and black circles mark the contractile  
 164 ring. **(bottom, right)** Data for mean GFP::anillin fluorescence per unit length (averaged over all angles  
 165 with baseline subtraction) for control (*grey*) and rho kinase depleted (*red*) embryos reveals that ring  
 166 anillin levels are increased 1.21-fold. Error bars are the SEM

**Figure 7—figure supplement 1**

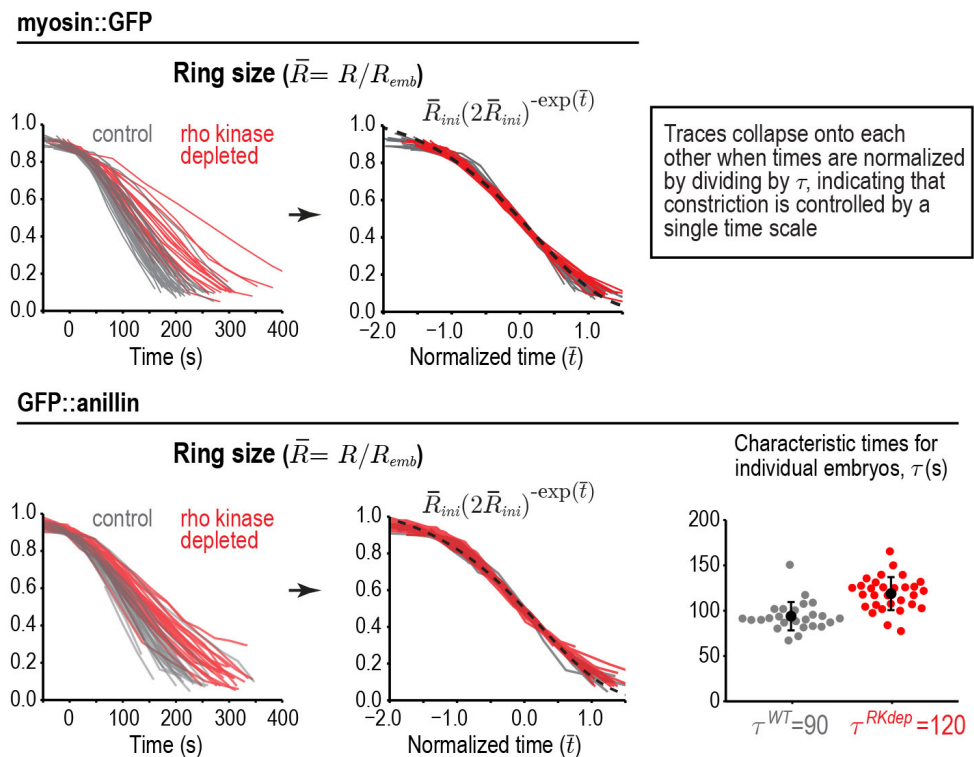

167 **Figure 7 – Figure Supplement 1. Ring constriction is determined by a single time scale.** Graphs of  
 168 ring size traces for individual control (*grey*, n=36 myosin::GFP or 26 GFP::anillin) and rho kinase  
 169 depleted (*red*; n=24 myosin::GFP or 30 GFP::anillin) embryos. Graph for myosin::GFP expressing  
 170 embryos is reproduced from Figure 6C for comparison. Traces of ring size for all embryos collapse to the  
 171 analytical curve (black dashed) when time is normalized by  $\tau$  and  $\bar{t} = 0$  is the point of 50% closure as  
 172 expected if constriction is controlled by a single time scale. **(bottom, right)** Traces from GFP::anillin

173 expressing embryos were fit to the ring size equation to determine characteristic times,  $\tau$ , for individual  
 174 control (*grey*) and rho kinase depleted (*red*) embryos which are plotted along with the mean and SD for  
 175 each condition (*black*). Rho kinase depletion increases  $\tau$  1.3-fold in GFP::anillin expressing embryos like  
 176 it does in myosin::GFP expressing embryos.

Figure 7—figure supplement 2

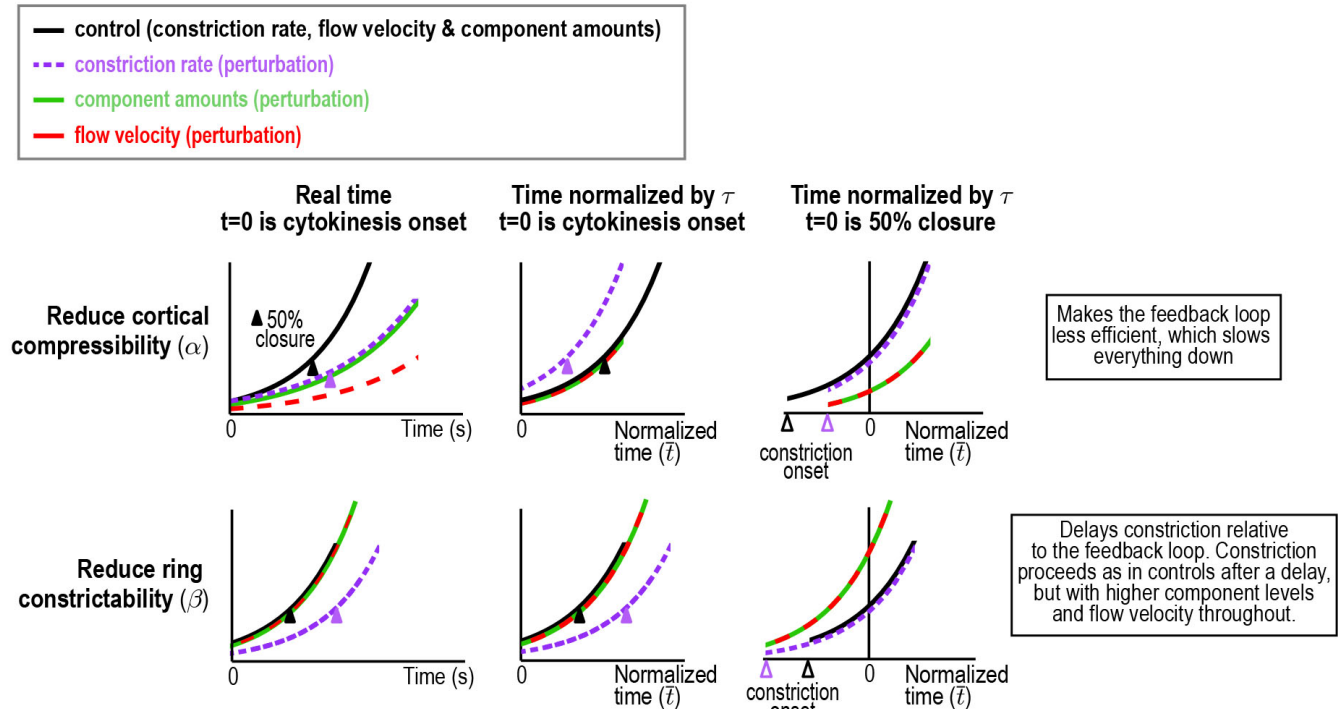

177

178

179 **Figure 7 – Figure Supplement 2. Predicted effects of altering properties of the cortex or ring.**  
 180 Schematics illustrate the effects predicted by the CoFFee model of reducing the ability of ring myosin to  
 181 compress the cortex (*top*) or constrict the ring (*bottom*) on the dynamics of per unit length component  
 182 amounts (*green*), constriction rate (*purple dashed*) and cortical flow velocity (*red dashed*). The effect on  
 183 each curve relative to control (*black*) is shown in three time references: real time with  $t=0$  set to  
 184 constriction onset (*left*), time normalized by  $\tau$  with  $t=0$  set to constriction onset (*center*), and time  
 185 normalized by  $\tau$  with  $t=0$  set to 50% closure (*right*). (*top*) Perturbations that decrease cortical  
 186 compressibility ( $\alpha$ ) would increase  $\tau$ . (*top, right*) In real time, constriction rate and ring component  
 187 amounts would increase with slower exponential kinetics ( $\propto e^{t/\tau}$ ) from the same starting point as in  
 188 controls, whereas flow velocity would increase with slower kinetics from a lower starting point ( $\propto \alpha e^{t/\tau}$ ).  
 189 (*top, center*) Normalizing time by  $\tau$ , causes rates to be per  $\tau$ ; this increases the flow velocity and  
 190 constriction rate curves by a factor of  $1/\alpha$ , bringing the flow velocity back to the control and making the  
 191 constriction rate start at a higher value than in controls. (*top, right*) Setting  $t=0$  to the 50% closure point  
 192 superimposes the constriction rate curve with the control, causing the curves for ring component

193 amounts and flow velocity to fall below the controls. Since comparing properties for the same  $\bar{t}$  in this  
194 reference is equivalent to comparing properties for a given ring size, reducing  $\alpha$  would lead to a  
195 reduction in component amounts for all ring sizes. (*bottom*) Reducing ring constrictability ( $\beta$ ) does not  
196 affect  $\tau$ . (*bottom, left*) In real time, flow velocity and ring component amounts increase with the same  
197 exponential kinetics as controls from the same starting point. The constriction rate also increases with the  
198 same exponential kinetics as in controls, but from a lower starting point due to the reduced  $\beta$ . Due to the  
199 exponential nature of the curves, the lower starting point effectively introduces a temporal offset,  
200 delaying constriction relative to the curves for ring component amounts and flow velocity. (*bottom,*  
201 *center*) Since reducing  $\beta$  does not affect  $\tau$ , normalizing time by  $\tau$  does not affect the relationship between  
202 the curves. (*bottom, right*) Setting  $t=0$  to the 50% closure point superimposes the constriction rate curve  
203 with the control and reveals that reducing  $\beta$  would lead to an increase in component amounts and flow  
204 velocity for all ring sizes.

205

## 206 SUPPLEMENTARY VIDEO LEGENDS

207

### 208 **Video 1. Cortical flow imaged in a control embryo expressing myosin::GFP.**

209 Playback is 6x realtime. The video is constructed from maximum intensity projection of 3 x 0.75  $\mu\text{m}$  plane  
210 z-stacks acquired at 2 s intervals. The red line marks the position of the division plane. The arrows  
211 represent the surface movement between consecutive frames at the base of the arrow. The length of the  
212 arrow is 5 times the magnitude of movement. The direction is also color coded according to the color  
213 wheel as shown in Figure 1b.

214

215 **Video 2. Average cortical flow map calculated from time lapse imaging of the cell surface in 93**  
216 **control embryos expressing myosin::GFP.** (*top, left*) Schematic illustrates location of the cylindrical  
217 surface covered by the map. (*top, right*) Dynamic schematic illustrates ring size and position for each  
218 value of  $t/t_{\text{ck}}$ . (*bottom, left*) The movement of each blue dot corresponds to surface movement at its  
219 location. The y-axis is the angular position relative to the initial ingression axis. The x-axis is the distance  
220 from the division plane along the anterior-posterior axis. (*bottom, right*) Dynamic graph plots the  
221 magnitude of the component of surface velocity aligned along the anterior-posterior axis for the top (150-  
222 180°; black) and bottom (0-30°; grey) regions of the cortex.

223

224 **Video 3. Average cortical flow map calculated from time lapse imaging of the cell surface in 68**  
225 ***arx-2(RNAi)* embryos expressing Myosin::GFP.** (*top, left*) Schematic illustrates the location of the  
226 cylindrical surface covered by the map. (*top, right*) Dynamic schematic illustrates ring size and position  
227 for each value of  $t/t_{\text{ck}}$ . (*bottom, left*) The movement of each blue dot corresponds to surface movement at  
228 its location. The y-axis is the angular position relative to the initial ingression axis. The x-axis is the  
229 distance from the division plane along the anterior-posterior axis. (*bottom, right*) Dynamic graph plots the  
230 magnitude of the component of surface velocity aligned along the anterior-posterior axis for the top (150-  
231 180°; black) and bottom (0-30°; grey) regions of the cortex.
